# Supplementary material for: A DNA barcode survey of insect biodiversity in Pakistan
Source: PeerJ. 2022 Apr 25;10:e13267. doi: 10.7717/peerj.13267 (PMC9048642; doi:10.7717/peerj.13267)
Supplement: Supplemental Information 1 [file peerj-10-13267-s001.xlsx]

## Sheet: Sheet1
S1 Table
Process ID	BIN	Order	Family	Subfamily	Genus	Species
GMPBM113-18	ACP7940	Blattodea	Blaberidae
GMPBS288-18	ACP7940	Blattodea	Blaberidae
MAMTS295-14	ACP7940	Blattodea	Blaberidae
MAIMB016-09	ABX6270	Blattodea	Blattidae	Blattinae	Periplaneta	Periplaneta americana
MAIMB020-09	ABX6270	Blattodea	Blattidae	Blattinae	Periplaneta	Periplaneta americana
MAIMB018-09	ACE9105	Blattodea	Blattidae	Blattinae	Periplaneta	Periplaneta americana
MAIMB017-09		Blattodea	Blattidae	Blattinae	Periplaneta	Periplaneta americana
MAIMB019-09		Blattodea	Blattidae	Blattinae	Periplaneta	Periplaneta americana
GMPQA625-19	AAG9959	Blattodea	Blattidae	Blattinae	Shelfordella
GMPQA626-19	AAG9959	Blattodea	Blattidae	Blattinae	Shelfordella
GMPBT091-18	ACJ3178	Blattodea	Ectobiidae	Blattellinae	Blattella	Blattella biligata
GMPBV002-18	ACJ3178	Blattodea	Ectobiidae	Blattellinae	Blattella	Blattella biligata
PMNHI167-15	ACJ3178	Blattodea	Ectobiidae	Blattellinae	Blattella	Blattella biligata
GMPBR055-18	AAG9967	Blattodea	Ectobiidae	Blattellinae	Blattella
MAMTN1021-14	ACO2804	Blattodea	Ectobiidae
MAMTN1022-14	ACO2804	Blattodea	Ectobiidae
PMNHC231-15	ACO2804	Blattodea	Ectobiidae
PMNHI169-15	ACO2804	Blattodea	Ectobiidae
PMNHJ166-15	ACO2804	Blattodea	Ectobiidae
PMNHB369-15	ACV2502	Blattodea	Ectobiidae
GMPBU102-18	ADU4800	Blattodea	Ectobiidae
GMPBV072-18	ADU4800	Blattodea	Ectobiidae
MATER004-10	AAN3283	Blattodea	Rhinotermitidae	Coptotermitinae	Coptotermes	Coptotermes travian
MATER011-10	AAN3283	Blattodea	Rhinotermitidae	Coptotermitinae	Coptotermes	Coptotermes travian
MATER012-10	AAN3283	Blattodea	Rhinotermitidae	Coptotermitinae	Coptotermes	Coptotermes travian
MATER013-10	AAN3283	Blattodea	Rhinotermitidae	Coptotermitinae	Coptotermes	Coptotermes travian
MATER048-11	AAN3283	Blattodea	Rhinotermitidae	Coptotermitinae	Coptotermes	Coptotermes travian
MATER015-10		Blattodea	Rhinotermitidae	Coptotermitinae	Coptotermes	Coptotermes travian
MATER046-11		Blattodea	Rhinotermitidae	Coptotermitinae	Coptotermes
MATER047-11		Blattodea	Rhinotermitidae	Coptotermitinae	Coptotermes
MATER049-11		Blattodea	Rhinotermitidae	Heterotermitinae	Heterotermes
MATER051-11		Blattodea	Rhinotermitidae	Heterotermitinae	Heterotermes
MATER035-11		Blattodea	Termitidae	Macrotermitinae	Microtermes	Microtermes mycophagus
MATER036-11		Blattodea	Termitidae	Macrotermitinae	Microtermes	Microtermes mycophagus
MATER032-11	AAZ6333	Blattodea	Termitidae	Macrotermitinae	Microtermes	Microtermes obesi
MATER030-11		Blattodea	Termitidae	Macrotermitinae	Microtermes	Microtermes obesi
MATER029-11	AAZ5363	Blattodea	Termitidae	Macrotermitinae	Microtermes	Microtermes unicolor
MATER031-11	AAZ5363	Blattodea	Termitidae	Macrotermitinae	Microtermes	Microtermes unicolor
MATER033-11	AAZ5363	Blattodea	Termitidae	Macrotermitinae	Microtermes	Microtermes unicolor
MATER037-11	AAZ5299	Blattodea	Termitidae	Macrotermitinae	Odontotermes	Odontotermes gurdaspurensis
MATER040-11	AAZ5299	Blattodea	Termitidae	Macrotermitinae	Odontotermes	Odontotermes gurdaspurensis
MATER041-11	AAZ5299	Blattodea	Termitidae	Macrotermitinae	Odontotermes	Odontotermes gurdaspurensis
MATER042-11	AAZ5299	Blattodea	Termitidae	Macrotermitinae	Odontotermes	Odontotermes gurdaspurensis
MAMTP2025-14	AAN2911	Blattodea	Termitidae	Macrotermitinae	Odontotermes	Odontotermes lokanandi
MAMTP2026-14	AAN2911	Blattodea	Termitidae	Macrotermitinae	Odontotermes	Odontotermes lokanandi
MATER018-10	AAN2911	Blattodea	Termitidae	Macrotermitinae	Odontotermes	Odontotermes lokanandi
MATER019-10	AAN2911	Blattodea	Termitidae	Macrotermitinae	Odontotermes	Odontotermes lokanandi
MATER020-10	AAN2911	Blattodea	Termitidae	Macrotermitinae	Odontotermes	Odontotermes lokanandi
MATER021-10	AAN2911	Blattodea	Termitidae	Macrotermitinae	Odontotermes	Odontotermes lokanandi
MATER022-10	AAN2911	Blattodea	Termitidae	Macrotermitinae	Odontotermes	Odontotermes lokanandi
MATER023-10	AAN2911	Blattodea	Termitidae	Macrotermitinae	Odontotermes	Odontotermes lokanandi
MATER024-10	AAN2911	Blattodea	Termitidae	Macrotermitinae	Odontotermes	Odontotermes lokanandi
MATER025-10	AAN2911	Blattodea	Termitidae	Macrotermitinae	Odontotermes	Odontotermes lokanandi
MATER026-10	AAN2911	Blattodea	Termitidae	Macrotermitinae	Odontotermes	Odontotermes lokanandi
MATER043-11	AAN2911	Blattodea	Termitidae	Macrotermitinae	Odontotermes	Odontotermes lokanandi
MATER044-11	AAN2911	Blattodea	Termitidae	Macrotermitinae	Odontotermes	Odontotermes lokanandi
MATER045-11	AAN2911	Blattodea	Termitidae	Macrotermitinae	Odontotermes	Odontotermes lokanandi
MATER039-11	ADC0072	Blattodea	Termitidae	Macrotermitinae	Odontotermes	Odontotermes obesus
MATER050-11	AAZ5428	Blattodea	Termitidae	Macrotermitinae	Odontotermes
MAMTP2024-14	ACO2596	Blattodea	Termitidae	Macrotermitinae	Odontotermes
MATER014-10	AAO1153	Blattodea	Termitidae	Termitinae	Angulitermes	Angulitermes dehraensis
MATER053-11	AAO1153	Blattodea	Termitidae	Termitinae	Angulitermes	Angulitermes dehraensis
MATER005-10	AAN4687	Blattodea	Termitidae	Termitinae	Microcerotermes
MATER010-10	AAN4687	Blattodea	Termitidae	Termitinae	Microcerotermes
GMPQI089-19	ADZ9648	Coleoptera	Aderidae		Aderus
MAMTJ886-12	ABZ8550	Coleoptera	Aderidae
MAMTV119-14	ACP3912	Coleoptera	Aderidae
MACOL823-10	AAP7986	Coleoptera	Anthicidae
MACOL942-10	AAP7986	Coleoptera	Anthicidae
MACOL943-10	AAP7986	Coleoptera	Anthicidae
PMNHB305-15	AAP7986	Coleoptera	Anthicidae
MACOL1870-12	AAP7999	Coleoptera	Anthicidae
MACOL1874-12	AAP7999	Coleoptera	Anthicidae
MACOL1875-12	AAP7999	Coleoptera	Anthicidae
MACOL1877-12	AAP7999	Coleoptera	Anthicidae
MACOL907-10	AAP7999	Coleoptera	Anthicidae
GMPBO208-18	AAP8001	Coleoptera	Anthicidae
GMPBR295-18	AAP8001	Coleoptera	Anthicidae
MACOL909-10	AAP8001	Coleoptera	Anthicidae
MACOL1631-12	ABX0166	Coleoptera	Anthicidae
MACOL1642-12	ABX0166	Coleoptera	Anthicidae
MACOL1879-12	ABX0166	Coleoptera	Anthicidae
MAMTN272-13	ACE0341	Coleoptera	Anthicidae
MAMTY340-14	ACE0341	Coleoptera	Anthicidae
NIABA057-15	ACE0341	Coleoptera	Anthicidae
PMNHN018-15	ACE0341	Coleoptera	Anthicidae
GMPBM289-18	ACF6083	Coleoptera	Anthicidae
GMPBO011-18	ACF6083	Coleoptera	Anthicidae
GMPBO201-18	ACF6083	Coleoptera	Anthicidae
GMPBO203-18	ACF6083	Coleoptera	Anthicidae
GMPBR254-18	ACF6083	Coleoptera	Anthicidae
MAMTP1710-13	ACF6083	Coleoptera	Anthicidae
MAMTP1733-13	ACF6682	Coleoptera	Anthicidae
MAMTR109-14	ACL4687	Coleoptera	Anthicidae
MAMTW256-14	ACL4687	Coleoptera	Anthicidae
GMPQC752-19	ACP7039	Coleoptera	Anthicidae
GMPQG606-19	ACP7039	Coleoptera	Anthicidae
GMPQI080-19	ACP7039	Coleoptera	Anthicidae
GMPQI086-19	ACP7039	Coleoptera	Anthicidae
GMPQI104-19	ACP7039	Coleoptera	Anthicidae
GMPQI137-19	ACP7039	Coleoptera	Anthicidae
GMPBK1638-18	ADT0248	Coleoptera	Anthicidae
GMPBK2071-18	ADT0248	Coleoptera	Anthicidae
GMPBK2656-18	ADT0248	Coleoptera	Anthicidae
GMPBK885-18	ADT0248	Coleoptera	Anthicidae
GMPBM277-18	ADT0248	Coleoptera	Anthicidae
GMPBO042-18	ADT0479	Coleoptera	Anthicidae
GMPBO163-18	ADT0479	Coleoptera	Anthicidae
GMPBP098-18	ADT0479	Coleoptera	Anthicidae
GMPBR285-18	ADT0479	Coleoptera	Anthicidae
GMPBR376-18	ADT0479	Coleoptera	Anthicidae
GMPBR412-18	ADT0479	Coleoptera	Anthicidae
GMPBR464-18	ADT0479	Coleoptera	Anthicidae
MAMTD524-12	ABX2090	Coleoptera	Anthribidae
MAMTG048-12	ABX2090	Coleoptera	Anthribidae
MAMTJ872-12	ABX2090	Coleoptera	Anthribidae
MAMTP1829-13	ACI9276	Coleoptera	Anthribidae
MAMTP1860-13	ACI9276	Coleoptera	Anthribidae
GMPBK2506-18	ACS4510	Coleoptera	Anthribidae
GMPBM181-18	ACS4510	Coleoptera	Anthribidae
GMPBX027-18	ACS4510	Coleoptera	Anthribidae
PMNHA330-14	ACS4510	Coleoptera	Anthribidae
MAMTD526-12		Coleoptera	Anthribidae
MACOL1648-12	ABX0155	Coleoptera	Archeocrypticidae
GMPBN041-18	ACF8916	Coleoptera	Archeocrypticidae
MAMTP1705-13	ACF8916	Coleoptera	Archeocrypticidae
PMNHD985-15	ACF8916	Coleoptera	Archeocrypticidae
MACOL600-10	ABV1610	Coleoptera	Attelabidae
GMPBP025-18	ADT2167	Coleoptera	Bostrichidae	Bostrichinae	Sinoxylon	Sinoxylon sudanicum
MAIMB524-09	ACB4329	Coleoptera	Bostrichidae	Dinoderinae	Rhyzopertha	Rhyzopertha dominica
MAIMB526-09	ACB4329	Coleoptera	Bostrichidae	Dinoderinae	Rhyzopertha	Rhyzopertha dominica
MAIMB527-09	ACB4329	Coleoptera	Bostrichidae	Dinoderinae	Rhyzopertha	Rhyzopertha dominica
MAIMB528-09	ACB4329	Coleoptera	Bostrichidae	Dinoderinae	Rhyzopertha	Rhyzopertha dominica
MASGI104-14	ACB4329	Coleoptera	Bostrichidae	Dinoderinae	Rhyzopertha	Rhyzopertha dominica
MASGI106-14	ACB4329	Coleoptera	Bostrichidae	Dinoderinae	Rhyzopertha	Rhyzopertha dominica
MASGI244-14	ACB4329	Coleoptera	Bostrichidae	Dinoderinae	Rhyzopertha	Rhyzopertha dominica
MASGI252-14	ACB4329	Coleoptera	Bostrichidae	Dinoderinae	Rhyzopertha	Rhyzopertha dominica
MASGI255-14	ACB4329	Coleoptera	Bostrichidae	Dinoderinae	Rhyzopertha	Rhyzopertha dominica
MASGI394-15	ACB4329	Coleoptera	Bostrichidae	Dinoderinae	Rhyzopertha	Rhyzopertha dominica
MASGI395-15	ACB4329	Coleoptera	Bostrichidae	Dinoderinae	Rhyzopertha	Rhyzopertha dominica
MASGI396-15	ACB4329	Coleoptera	Bostrichidae	Dinoderinae	Rhyzopertha	Rhyzopertha dominica
MASGI410-15	ACB4329	Coleoptera	Bostrichidae	Dinoderinae	Rhyzopertha	Rhyzopertha dominica
MASGI415-15	ACB4329	Coleoptera	Bostrichidae	Dinoderinae	Rhyzopertha	Rhyzopertha dominica
MASGI417-15	ACB4329	Coleoptera	Bostrichidae	Dinoderinae	Rhyzopertha	Rhyzopertha dominica
MASGI418-15	ACB4329	Coleoptera	Bostrichidae	Dinoderinae	Rhyzopertha	Rhyzopertha dominica
MASGI419-15	ACB4329	Coleoptera	Bostrichidae	Dinoderinae	Rhyzopertha	Rhyzopertha dominica
MASGI430-15	ACB4329	Coleoptera	Bostrichidae	Dinoderinae	Rhyzopertha	Rhyzopertha dominica
MASGI434-15	ACB4329	Coleoptera	Bostrichidae	Dinoderinae	Rhyzopertha	Rhyzopertha dominica
MASGI435-15	ACB4329	Coleoptera	Bostrichidae	Dinoderinae	Rhyzopertha	Rhyzopertha dominica
MASGI439-15	ACB4329	Coleoptera	Bostrichidae	Dinoderinae	Rhyzopertha	Rhyzopertha dominica
MASGI441-15	ACB4329	Coleoptera	Bostrichidae	Dinoderinae	Rhyzopertha	Rhyzopertha dominica
MASGI447-15	ACB4329	Coleoptera	Bostrichidae	Dinoderinae	Rhyzopertha	Rhyzopertha dominica
MASGI448-15	ACB4329	Coleoptera	Bostrichidae	Dinoderinae	Rhyzopertha	Rhyzopertha dominica
MASGI449-15	ACB4329	Coleoptera	Bostrichidae	Dinoderinae	Rhyzopertha	Rhyzopertha dominica
MASGI450-15	ACB4329	Coleoptera	Bostrichidae	Dinoderinae	Rhyzopertha	Rhyzopertha dominica
MASGI452-15	ACB4329	Coleoptera	Bostrichidae	Dinoderinae	Rhyzopertha	Rhyzopertha dominica
MASGI453-15	ACB4329	Coleoptera	Bostrichidae	Dinoderinae	Rhyzopertha	Rhyzopertha dominica
MASGI454-15	ACB4329	Coleoptera	Bostrichidae	Dinoderinae	Rhyzopertha	Rhyzopertha dominica
MASGI469-15	ACB4329	Coleoptera	Bostrichidae	Dinoderinae	Rhyzopertha	Rhyzopertha dominica
MASGI471-15	ACB4329	Coleoptera	Bostrichidae	Dinoderinae	Rhyzopertha	Rhyzopertha dominica
GMPBC052-18	ABX0157	Coleoptera	Bostrichidae
MACOL1649-12	ABX0157	Coleoptera	Bostrichidae
MACOL2953-13	ACI8820	Coleoptera	Bostrichidae
GMPQE868-19	AEA1028	Coleoptera	Bostrichidae
MACOL840-10		Coleoptera	Brentidae	Brentinae	Cylas	Cylas formicarius
MAMTG050-12	ABZ8708	Coleoptera	Brentidae
MAMTI1454-12	ABZ8708	Coleoptera	Brentidae
MAMTP1862-13	ACI9667	Coleoptera	Brentidae
GMPBC111-18	ADS1531	Coleoptera	Brentidae
GMPBG016-18	ADS1531	Coleoptera	Brentidae
GMPBG050-18	ADS1531	Coleoptera	Brentidae
GMPBG170-18	ADS1531	Coleoptera	Brentidae
GMPBG184-18	ADS1531	Coleoptera	Brentidae
GMPBG241-18	ADS1531	Coleoptera	Brentidae
GMPBH173-18	ADS1531	Coleoptera	Brentidae
GMPBH351-18	ADS1531	Coleoptera	Brentidae
GMPBH494-18	ADS1531	Coleoptera	Brentidae
GMPBI029-18	ADS1531	Coleoptera	Brentidae
GMPBJ055-18	ADS1531	Coleoptera	Brentidae
GMPBJ126-18	ADS1531	Coleoptera	Brentidae
GMPBK1450-18	ADS1531	Coleoptera	Brentidae
GMPBK2446-18	ADS1531	Coleoptera	Brentidae
GMPBK2514-18	ADS1531	Coleoptera	Brentidae
GMPBK2648-18	ADS1531	Coleoptera	Brentidae
GMPBK2669-18	ADS1531	Coleoptera	Brentidae
GMPBK3199-18	ADS1531	Coleoptera	Brentidae
GMPBS015-18	ADS1531	Coleoptera	Brentidae
GMPBW057-18	ADS1531	Coleoptera	Brentidae
GMPBX042-18	ADS1531	Coleoptera	Brentidae
GMPBX056-18	ADS1531	Coleoptera	Brentidae
GMPBI135-18	ADS1532	Coleoptera	Brentidae
GMPBI259-18	ADS1532	Coleoptera	Brentidae
GMPBK2500-18	ADS1532	Coleoptera	Brentidae
GMPBK362-18	ADS1532	Coleoptera	Brentidae
GMPBW039-18	ADS1532	Coleoptera	Brentidae
GMPBH442-18	ADS9836	Coleoptera	Brentidae
GMPBJ150-18	ADS9836	Coleoptera	Brentidae
GMPBJ203-18	ADS9836	Coleoptera	Brentidae
GMPBJ242-18	ADS9836	Coleoptera	Brentidae
GMPBJ543-18	ADS9836	Coleoptera	Brentidae
GMPBK1156-18	ADS9836	Coleoptera	Brentidae
GMPBK1410-18	ADS9836	Coleoptera	Brentidae
GMPBK2397-18	ADS9836	Coleoptera	Brentidae
GMPBK2649-18	ADS9836	Coleoptera	Brentidae
GMPBK3200-18	ADS9836	Coleoptera	Brentidae
GMPBK3406-18	ADS9836	Coleoptera	Brentidae
GMPBK3503-18	ADS9836	Coleoptera	Brentidae
GMPBK853-18	ADS9836	Coleoptera	Brentidae
GMPBL104-18	ADS9836	Coleoptera	Brentidae
GMPBM241-18	ADS9836	Coleoptera	Brentidae
GMPBM658-18	ADS9836	Coleoptera	Brentidae
GMPBV012-18	ADS9836	Coleoptera	Brentidae
GMPBH353-18	ADU6561	Coleoptera	Brentidae
GMPBK1774-18	ADU6561	Coleoptera	Brentidae
GMPQG610-19	AEA1901	Coleoptera	Brentidae
GMPQE1352-19	AEA3002	Coleoptera	Brentidae
MAMTI1452-12	ACP4227	Coleoptera	Buprestidae	Agrilinae
MAMTO288-13	ACP4227	Coleoptera	Buprestidae	Agrilinae
MAMTP1701-13	ACP4227	Coleoptera	Buprestidae	Agrilinae
MAMTP1704-13	ACP4227	Coleoptera	Buprestidae	Agrilinae
MAMTP1717-13	ACP4227	Coleoptera	Buprestidae	Agrilinae
MAMTP1718-13	ACP4227	Coleoptera	Buprestidae	Agrilinae
MAMTP1719-13	ACP4227	Coleoptera	Buprestidae	Agrilinae
MAMTP1725-13	ACP4227	Coleoptera	Buprestidae	Agrilinae
MAMTP1726-13	ACP4227	Coleoptera	Buprestidae	Agrilinae
MAMTS212-14	ACP4227	Coleoptera	Buprestidae	Agrilinae
PMNHA561-14	ACP4227	Coleoptera	Buprestidae	Agrilinae
PMNHD987-15	ACP4227	Coleoptera	Buprestidae	Agrilinae
PMNHJ075-15	ACP4227	Coleoptera	Buprestidae	Agrilinae
PMNHD951-15	ACW8356	Coleoptera	Buprestidae	Agrilinae
PMNHI125-15	ADJ2338	Coleoptera	Buprestidae	Agrilinae
MAMTP1709-13		Coleoptera	Buprestidae	Agrilinae
MAMTJ871-12	ABZ8554	Coleoptera	Buprestidae	Buprestinae
PMNHD1262-15	ACR7958	Coleoptera	Buprestidae	Buprestinae
MACOL1727-12	ABW8762	Coleoptera	Buprestidae	Chrysochroinae	Sphenoptera
MACOL1434-11	AAP7913	Coleoptera	Buprestidae
MACOL1435-11	AAP7913	Coleoptera	Buprestidae
MACOL490-10	AAP7913	Coleoptera	Buprestidae
MACOL1553-12	ABW2875	Coleoptera	Buprestidae
MACOL1554-12	ABW2875	Coleoptera	Buprestidae
MACOL1432-11		Coleoptera	Buprestidae
MACOL489-10		Coleoptera	Buprestidae
MACOL598-10	AAP7947	Coleoptera	Cantharidae
MACOL775-10	AAP7947	Coleoptera	Cantharidae
MACOL1510-11	AAP7948	Coleoptera	Cantharidae
MACOL601-10	AAP7948	Coleoptera	Cantharidae
MACOL603-10	AAP7948	Coleoptera	Cantharidae
MACOL1507-11	AAZ5743	Coleoptera	Cantharidae
MACOL1508-11	AAZ5743	Coleoptera	Cantharidae
MACOL2115-12	AAZ5743	Coleoptera	Cantharidae
MACOL2117-12	AAZ5743	Coleoptera	Cantharidae
MACOL2119-12	AAZ5743	Coleoptera	Cantharidae
MACOL2328-12	AAZ5743	Coleoptera	Cantharidae
MACOL2329-12	AAZ5743	Coleoptera	Cantharidae
MACOL1509-11	AAZ5744	Coleoptera	Cantharidae
MACOL2324-12	AAZ5744	Coleoptera	Cantharidae
MACOL2325-12	AAZ5744	Coleoptera	Cantharidae
MACOL2326-12	AAZ5744	Coleoptera	Cantharidae
MACOL2327-12	AAZ5744	Coleoptera	Cantharidae
MACOL1511-11	AAZ5745	Coleoptera	Cantharidae
MACOL2335-12	AAZ5745	Coleoptera	Cantharidae
MACOL1512-11	AAZ5746	Coleoptera	Cantharidae
MACOL1528-11	AAZ5754	Coleoptera	Cantharidae
MACOL1530-11	AAZ5754	Coleoptera	Cantharidae
MACOL1545-11	AAZ5757	Coleoptera	Cantharidae
MACOL1546-11	AAZ5757	Coleoptera	Cantharidae
MACOL1547-11	AAZ5757	Coleoptera	Cantharidae
GMPBK1629-18	ABZ8965	Coleoptera	Cantharidae
GMPBK995-18	ABZ8965	Coleoptera	Cantharidae
GMPBL585-18	ABZ8965	Coleoptera	Cantharidae
GMPBM128-18	ABZ8965	Coleoptera	Cantharidae
MAMTK556-12	ABZ8965	Coleoptera	Cantharidae
MAMTN115-13	ABZ8965	Coleoptera	Cantharidae
MACOL2121-12	ACA4220	Coleoptera	Cantharidae
MACOL2330-12	ACA4220	Coleoptera	Cantharidae
MACOL2331-12	ACA4220	Coleoptera	Cantharidae
MACOL2332-12	ACA4220	Coleoptera	Cantharidae
MACOL2333-12	ACA4220	Coleoptera	Cantharidae
MACOL2334-12	ACA4220	Coleoptera	Cantharidae
MACOL2120-12	ACA4221	Coleoptera	Cantharidae
MACOL2113-12	ACA4222	Coleoptera	Cantharidae
MACOL2114-12	ACA4222	Coleoptera	Cantharidae
MACOL2116-12	ACA4222	Coleoptera	Cantharidae
MACOL2118-12	ACA4222	Coleoptera	Cantharidae
MACOL2336-12	ACB3615	Coleoptera	Cantharidae
MACOL1529-11		Coleoptera	Cantharidae
MACOL602-10		Coleoptera	Cantharidae
MACOL1112-11		Coleoptera	Carabidae	Cicindelinae	Calomera	Calomera aulica
MACOL1078-11	ABW8758	Coleoptera	Carabidae	Cicindelinae	Calomera	Calomera chloris
MACOL1080-11	ABW8758	Coleoptera	Carabidae	Cicindelinae	Calomera	Calomera chloris
MACOL1082-11	ABW8758	Coleoptera	Carabidae	Cicindelinae	Calomera	Calomera chloris
MACOL1703-12	ABW8758	Coleoptera	Carabidae	Cicindelinae	Calomera	Calomera chloris
MACOL1706-12	ABW8758	Coleoptera	Carabidae	Cicindelinae	Calomera	Calomera chloris
MACOL1117-11		Coleoptera	Carabidae	Cicindelinae	Cicindela	Cicindela flavomaculata
MACOL1118-11		Coleoptera	Carabidae	Cicindelinae	Cicindela	Cicindela flavomaculata
MACOL1120-11	AAP7899	Coleoptera	Carabidae	Cicindelinae	Cosmodela	Cosmodela intermedia
MACOL1122-11	AAP7899	Coleoptera	Carabidae	Cicindelinae	Cosmodela	Cosmodela intermedia
MACOL1124-11	AAP7899	Coleoptera	Carabidae	Cicindelinae	Cosmodela	Cosmodela intermedia
MACOL162-10	AAP7899	Coleoptera	Carabidae	Cicindelinae	Cosmodela	Cosmodela intermedia
MACOL163-10	AAP7899	Coleoptera	Carabidae	Cicindelinae	Cosmodela	Cosmodela intermedia
MACOL164-10	AAP7899	Coleoptera	Carabidae	Cicindelinae	Cosmodela	Cosmodela intermedia
MACOL165-10	AAP7899	Coleoptera	Carabidae	Cicindelinae	Cosmodela	Cosmodela intermedia
MACOL1157-11	AAZ9621	Coleoptera	Carabidae	Cicindelinae	Cylindera	Cylindera albopunctata
MACOL1172-11	AAZ9621	Coleoptera	Carabidae	Cicindelinae	Cylindera	Cylindera albopunctata
MACOL2357-12	AAZ9621	Coleoptera	Carabidae	Cicindelinae	Cylindera	Cylindera albopunctata
MACOL1111-11	AAZ9344	Coleoptera	Carabidae	Cicindelinae	Cylindera	Cylindera bigemina
MACOL1108-11	AAZ9343	Coleoptera	Carabidae	Cicindelinae	Cylindera	Cylindera brevis
MACOL1109-11	AAZ9343	Coleoptera	Carabidae	Cicindelinae	Cylindera	Cylindera brevis
MACOL1110-11	AAZ9343	Coleoptera	Carabidae	Cicindelinae	Cylindera	Cylindera brevis
MACOL1129-11	AAZ9343	Coleoptera	Carabidae	Cicindelinae	Cylindera	Cylindera brevis
MACOL1131-11	AAZ9343	Coleoptera	Carabidae	Cicindelinae	Cylindera	Cylindera brevis
MACOL1158-11		Coleoptera	Carabidae	Cicindelinae	Cylindera	Cylindera erudita
MACOL1096-11	AAP7903	Coleoptera	Carabidae	Cicindelinae	Cylindera	Cylindera gramophora
MACOL1097-11	AAP7903	Coleoptera	Carabidae	Cicindelinae	Cylindera	Cylindera gramophora
MACOL1098-11	AAP7903	Coleoptera	Carabidae	Cicindelinae	Cylindera	Cylindera gramophora
MACOL1099-11	AAP7903	Coleoptera	Carabidae	Cicindelinae	Cylindera	Cylindera gramophora
MACOL1100-11	AAP7903	Coleoptera	Carabidae	Cicindelinae	Cylindera	Cylindera gramophora
MACOL174-10	AAP7903	Coleoptera	Carabidae	Cicindelinae	Cylindera	Cylindera gramophora
MACOL1126-11		Coleoptera	Carabidae	Cicindelinae	Cylindera	Cylindera obliquefaciata
MACOL1127-11		Coleoptera	Carabidae	Cicindelinae	Cylindera	Cylindera obliquefaciata
MACOL1128-11		Coleoptera	Carabidae	Cicindelinae	Cylindera	Cylindera obliquefaciata
MACOL1103-11		Coleoptera	Carabidae	Cicindelinae	Cylindera	Cylindera sublacerata
MACOL1104-11		Coleoptera	Carabidae	Cicindelinae	Cylindera	Cylindera sublacerata
MACOL1088-11	AAZ9622	Coleoptera	Carabidae	Cicindelinae	Cylindera	Cylindera subtilesingnata
MACOL1083-11		Coleoptera	Carabidae	Cicindelinae	Cylindera	Cylindera venosa
MACOL1085-11		Coleoptera	Carabidae	Cicindelinae	Cylindera	Cylindera venosa
MACOL166-10	AAP7900	Coleoptera	Carabidae	Cicindelinae	Cylindera
MACOL175-10	AAX2903	Coleoptera	Carabidae	Cicindelinae	Megacephala	Megacephala euphratica
MACOL1091-11	AAP7901	Coleoptera	Carabidae	Cicindelinae	Myriochila	Myriochila melancholica
MACOL1093-11	AAP7901	Coleoptera	Carabidae	Cicindelinae	Myriochila	Myriochila melancholica
MACOL167-10	AAP7901	Coleoptera	Carabidae	Cicindelinae	Myriochila	Myriochila melancholica
MACOL168-10	AAP7901	Coleoptera	Carabidae	Cicindelinae	Myriochila	Myriochila melancholica
MACOL169-10	AAP7901	Coleoptera	Carabidae	Cicindelinae	Myriochila	Myriochila melancholica
MACOL170-10	AAP7901	Coleoptera	Carabidae	Cicindelinae	Myriochila	Myriochila melancholica
MACOL1707-12	AAP7901	Coleoptera	Carabidae	Cicindelinae	Myriochila	Myriochila melancholica
MACOL1708-12	AAP7901	Coleoptera	Carabidae	Cicindelinae	Myriochila	Myriochila melancholica
MACOL1709-12	AAP7901	Coleoptera	Carabidae	Cicindelinae	Myriochila	Myriochila melancholica
MACOL171-10	AAP7901	Coleoptera	Carabidae	Cicindelinae	Myriochila	Myriochila melancholica
MACOL172-10	AAP7901	Coleoptera	Carabidae	Cicindelinae	Myriochila	Myriochila melancholica
MACOL1143-11	AAZ9651	Coleoptera	Carabidae	Cicindelinae	Myriochila	Myriochila undulata
MACOL263-10	AAP7119	Coleoptera	Carabidae	Harpalinae	Acinopus
MACOL1378-11	AAZ4388	Coleoptera	Carabidae	Harpalinae	Anthia	Anthia sexgutatta
MACOL1379-11	AAZ4388	Coleoptera	Carabidae	Harpalinae	Anthia	Anthia sexgutatta
MACOL1692-12	AAZ4388	Coleoptera	Carabidae	Harpalinae	Anthia	Anthia sexgutatta
MACOL1693-12	AAZ4388	Coleoptera	Carabidae	Harpalinae	Anthia	Anthia sexgutatta
MACOL240-10	AAZ4388	Coleoptera	Carabidae	Harpalinae	Anthia	Anthia sexgutatta
MACOL595-10	AAP7945	Coleoptera	Carabidae	Harpalinae	Calathus
MACOL047-10	AAP8595	Coleoptera	Carabidae	Harpalinae	Chlaenius
MACOL048-10	AAP8596	Coleoptera	Carabidae	Harpalinae	Chlaenius
MACOL447-10	AAP8615	Coleoptera	Carabidae	Harpalinae	Chlaenius
MACOL448-10	AAP8615	Coleoptera	Carabidae	Harpalinae	Chlaenius
MACOL449-10	AAP8615	Coleoptera	Carabidae	Harpalinae	Chlaenius
MACOL1515-11	AAZ5749	Coleoptera	Carabidae	Harpalinae	Chlaenius
MACOL2106-12	AAP7120	Coleoptera	Carabidae	Harpalinae	Harpalus	Harpalus tenebrosus
MACOL2107-12	AAP7120	Coleoptera	Carabidae	Harpalinae	Harpalus	Harpalus tenebrosus
MACOL264-10	AAP7120	Coleoptera	Carabidae	Harpalinae	Harpalus	Harpalus tenebrosus
MACOL266-10	AAP7120	Coleoptera	Carabidae	Harpalinae	Harpalus	Harpalus tenebrosus
MACOL267-10	AAP7120	Coleoptera	Carabidae	Harpalinae	Harpalus	Harpalus tenebrosus
MACOL268-10	AAP7120	Coleoptera	Carabidae	Harpalinae	Harpalus	Harpalus tenebrosus
MACOL269-10	AAP7120	Coleoptera	Carabidae	Harpalinae	Harpalus	Harpalus tenebrosus
PMNHD1389-15	AAP7120	Coleoptera	Carabidae	Harpalinae	Harpalus	Harpalus tenebrosus
MACOL265-10		Coleoptera	Carabidae	Harpalinae	Harpalus	Harpalus tenebrosus
MACOL261-10	ABA6322	Coleoptera	Carabidae	Harpalinae	Harpalus
MACOL2339-12	ACB3770	Coleoptera	Carabidae	Harpalinae	Harpalus
MACOL2340-12	ACB3770	Coleoptera	Carabidae	Harpalinae	Harpalus
MACOL2341-12	ACB3770	Coleoptera	Carabidae	Harpalinae	Harpalus
MACOL2342-12	ACB3770	Coleoptera	Carabidae	Harpalinae	Harpalus
MACOL2383-12	AAP8003	Coleoptera	Carabidae	Harpalinae	Microlestes
MACOL2606-12	AAP8003	Coleoptera	Carabidae	Harpalinae	Microlestes
MACOL912-10	AAP8003	Coleoptera	Carabidae	Harpalinae	Microlestes
MASGI310-14	AAP8003	Coleoptera	Carabidae	Harpalinae	Microlestes
MACOL1145-11	AAZ8101	Coleoptera	Carabidae	Harpalinae	Neocollyris	Neocollyris bonellii
MACOL1146-11	AAZ8101	Coleoptera	Carabidae	Harpalinae	Neocollyris	Neocollyris bonellii
MACOL1147-11	AAZ8101	Coleoptera	Carabidae	Harpalinae	Neocollyris	Neocollyris bonellii
MACOL1148-11	AAZ8100	Coleoptera	Carabidae	Harpalinae	Neocollyris	Neocollyris redtenbacheri
MACOL1149-11	AAZ8100	Coleoptera	Carabidae	Harpalinae	Neocollyris	Neocollyris redtenbacheri
MACOL1150-11	AAZ8100	Coleoptera	Carabidae	Harpalinae	Neocollyris	Neocollyris redtenbacheri
MACOL474-10	AAP8620	Coleoptera	Carabidae	Harpalinae	Ophionea	Ophionea indica
MACOL475-10	AAP8620	Coleoptera	Carabidae	Harpalinae	Ophionea	Ophionea indica
MTINS073-18	AAP8620	Coleoptera	Carabidae	Harpalinae	Ophionea	Ophionea indica
MTINS074-18	AAP8620	Coleoptera	Carabidae	Harpalinae	Ophionea	Ophionea indica
MTINS097-19	AAP8620	Coleoptera	Carabidae	Harpalinae	Ophionea	Ophionea indica
MTINS106-19	AAP8620	Coleoptera	Carabidae	Harpalinae	Ophionea	Ophionea indica
MTINS121-19	AAP8620	Coleoptera	Carabidae	Harpalinae	Ophionea	Ophionea indica
MACOL270-10	AAP7121	Coleoptera	Carabidae	Harpalinae	Parophonus
MACOL2026-12	ABX6882	Coleoptera	Carabidae	Harpalinae	Parophonus
MACOL2030-12	ABX6882	Coleoptera	Carabidae	Harpalinae	Parophonus
MACOL2033-12	ABX6882	Coleoptera	Carabidae	Harpalinae	Parophonus
MAMTP1823-13	ABX6882	Coleoptera	Carabidae	Harpalinae	Parophonus
MACOL262-10	AAU7219	Coleoptera	Carabidae	Harpalinae	Poecilus
MACOL2986-13	AAN0041	Coleoptera	Carabidae	Harpalinae	Stenolophus
MACOL444-10	ACU9482	Coleoptera	Carabidae	Harpalinae
PMNHJ169-15	ACU9482	Coleoptera	Carabidae	Harpalinae
MACOL2338-12	ACB3616	Coleoptera	Carabidae	Nebriinae	Nebria
MACOL487-10	AAU7091	Coleoptera	Carabidae	Nebriinae	Notiophilus
MACOL208-10	ABA6325	Coleoptera	Carabidae	Paussinae	Paussus
MAMTO278-13	ACG6201	Coleoptera	Carabidae	Paussinae	Paussus
MAMTO305-13	ACG6201	Coleoptera	Carabidae	Paussinae	Paussus
MAMTP1870-13	ACG6201	Coleoptera	Carabidae	Paussinae	Paussus
MAMTQ249-14	ACG6201	Coleoptera	Carabidae	Paussinae	Paussus
MAMTP1854-13	ACI9565	Coleoptera	Carabidae	Paussinae	Paussus
MAMTQ248-14	ACI9565	Coleoptera	Carabidae	Paussinae	Paussus
MAMTS049-14	ACI9565	Coleoptera	Carabidae	Paussinae	Paussus
PMNHG007-15	ACI9565	Coleoptera	Carabidae	Paussinae	Paussus
PMNHG009-15	ACI9565	Coleoptera	Carabidae	Paussinae	Paussus
PMNHG010-15	ACI9565	Coleoptera	Carabidae	Paussinae	Paussus
MAMTP1864-13	ACI9668	Coleoptera	Carabidae	Paussinae	Paussus
MACOL1586-12	ABX0158	Coleoptera	Carabidae	Scaritinae	Dyschirius
MACOL1909-12	ABX0158	Coleoptera	Carabidae	Scaritinae	Dyschirius
MACOL2658-12	ABX0158	Coleoptera	Carabidae	Scaritinae	Dyschirius
MACOL1593-12	ABX0160	Coleoptera	Carabidae	Scaritinae	Dyschirius
MACOL1622-12	ABX0160	Coleoptera	Carabidae	Scaritinae	Dyschirius
MACOL1633-12	ABX0160	Coleoptera	Carabidae	Scaritinae	Dyschirius
MACOL1645-12	ABX0160	Coleoptera	Carabidae	Scaritinae	Dyschirius
MACOL1853-12	ABX0160	Coleoptera	Carabidae	Scaritinae	Dyschirius
MACOL1859-12	ABX0160	Coleoptera	Carabidae	Scaritinae	Dyschirius
MACOL1899-12	ABX0160	Coleoptera	Carabidae	Scaritinae	Dyschirius
MACOL1925-12	ABX0160	Coleoptera	Carabidae	Scaritinae	Dyschirius
MACOL1935-12	ABX0160	Coleoptera	Carabidae	Scaritinae	Dyschirius
MACOL2375-12	ABX0160	Coleoptera	Carabidae	Scaritinae	Dyschirius
MACOL2378-12	ABX0160	Coleoptera	Carabidae	Scaritinae	Dyschirius
MACOL2424-12	ABX0160	Coleoptera	Carabidae	Scaritinae	Dyschirius
MACOL2464-12	ABX0160	Coleoptera	Carabidae	Scaritinae	Dyschirius
MACOL2465-12	ABX0160	Coleoptera	Carabidae	Scaritinae	Dyschirius
MACOL2597-12	ABX0160	Coleoptera	Carabidae	Scaritinae	Dyschirius
MACOL2603-12	ABX0160	Coleoptera	Carabidae	Scaritinae	Dyschirius
MACOL2604-12	ABX0160	Coleoptera	Carabidae	Scaritinae	Dyschirius
MACOL2605-12	ABX0160	Coleoptera	Carabidae	Scaritinae	Dyschirius
MACOL2607-12	ABX0160	Coleoptera	Carabidae	Scaritinae	Dyschirius
MACOL2609-12	ABX0160	Coleoptera	Carabidae	Scaritinae	Dyschirius
MACOL2611-12	ABX0160	Coleoptera	Carabidae	Scaritinae	Dyschirius
MACOL2657-12	ABX0160	Coleoptera	Carabidae	Scaritinae	Dyschirius
MACOL2610-12	ACC5069	Coleoptera	Carabidae	Scaritinae	Dyschirius
MACOL1582-12		Coleoptera	Carabidae	Scaritinae	Dyschirius
MACOL1583-12		Coleoptera	Carabidae	Scaritinae	Dyschirius
MACOL1584-12		Coleoptera	Carabidae	Scaritinae	Dyschirius
MACOL1734-12	ABW8738	Coleoptera	Carabidae	Trechinae	Pogonus
MACOL1858-12	AAP6813	Coleoptera	Carabidae
MACOL239-10	AAP7109	Coleoptera	Carabidae
MACOL949-10	AAP7109	Coleoptera	Carabidae
MACOL241-10	AAP7110	Coleoptera	Carabidae
MACOL242-10	AAP7110	Coleoptera	Carabidae
MACOL243-10	AAP7110	Coleoptera	Carabidae
MACOL244-10	AAP7110	Coleoptera	Carabidae
MACOL245-10	AAP7111	Coleoptera	Carabidae
MACOL252-10	AAP7112	Coleoptera	Carabidae
PMNHG002-15	AAP7112	Coleoptera	Carabidae
MACOL253-10	AAP7113	Coleoptera	Carabidae
MACOL254-10	AAP7113	Coleoptera	Carabidae
MACOL132-10	AAP7114	Coleoptera	Carabidae
MACOL133-10	AAP7114	Coleoptera	Carabidae
MACOL134-10	AAP7114	Coleoptera	Carabidae
MACOL135-10	AAP7114	Coleoptera	Carabidae
MACOL136-10	AAP7114	Coleoptera	Carabidae
MACOL255-10	AAP7114	Coleoptera	Carabidae
MACOL256-10	AAP7114	Coleoptera	Carabidae
MACOL257-10	AAP7115	Coleoptera	Carabidae
MACOL1382-11	AAP7116	Coleoptera	Carabidae
MACOL258-10	AAP7116	Coleoptera	Carabidae
MACOL259-10	AAP7116	Coleoptera	Carabidae
MACOL1390-11	AAP7117	Coleoptera	Carabidae
MACOL260-10	AAP7117	Coleoptera	Carabidae
MACOL281-10	AAP7125	Coleoptera	Carabidae
MACOL2022-12	AAP7126	Coleoptera	Carabidae
MACOL2023-12	AAP7126	Coleoptera	Carabidae
MACOL2032-12	AAP7126	Coleoptera	Carabidae
MACOL282-10	AAP7126	Coleoptera	Carabidae
MACOL283-10	AAP7126	Coleoptera	Carabidae
MACOL806-10	AAP7126	Coleoptera	Carabidae
MACOL944-10	AAP7126	Coleoptera	Carabidae
MACOL141-10	AAP7893	Coleoptera	Carabidae
MACOL142-10	AAP7894	Coleoptera	Carabidae
MACOL143-10	AAP7894	Coleoptera	Carabidae
MACOL144-10	AAP7894	Coleoptera	Carabidae
MACOL145-10	AAP7894	Coleoptera	Carabidae
MACOL2363-12	AAP7894	Coleoptera	Carabidae
MACOL2364-12	AAP7894	Coleoptera	Carabidae
MACOL157-10	AAP7898	Coleoptera	Carabidae
MACOL159-10	AAP7898	Coleoptera	Carabidae
MACOL160-10	AAP7898	Coleoptera	Carabidae
MACOL161-10	AAP7898	Coleoptera	Carabidae
MACOL1999-12	AAP7898	Coleoptera	Carabidae
MACOL173-10	AAP7902	Coleoptera	Carabidae
MACOL2027-12	AAP7908	Coleoptera	Carabidae
MACOL2031-12	AAP7908	Coleoptera	Carabidae
MACOL477-10	AAP7908	Coleoptera	Carabidae
MACOL597-10	AAP7908	Coleoptera	Carabidae
MACOL896-10	AAP7908	Coleoptera	Carabidae
MAMTP1830-13	AAP7908	Coleoptera	Carabidae
MAMTP1844-13	AAP7908	Coleoptera	Carabidae
MAMTR121-14	AAP7908	Coleoptera	Carabidae
MACOL478-10	AAP7909	Coleoptera	Carabidae
MACOL586-10	AAP7938	Coleoptera	Carabidae
MACOL785-10	AAP7974	Coleoptera	Carabidae
MACOL809-10	AAP7982	Coleoptera	Carabidae
MACOL043-10	AAP7984	Coleoptera	Carabidae
MACOL044-10	AAP7984	Coleoptera	Carabidae
MACOL045-10	AAP7984	Coleoptera	Carabidae
MACOL1990-12	AAP7984	Coleoptera	Carabidae
MACOL1991-12	AAP7984	Coleoptera	Carabidae
MACOL1994-12	AAP7984	Coleoptera	Carabidae
MACOL813-10	AAP7984	Coleoptera	Carabidae
MACOL929-10	AAP7984	Coleoptera	Carabidae
MACOL930-10	AAP7984	Coleoptera	Carabidae
MACOL931-10	AAP7984	Coleoptera	Carabidae
MACOL1568-12	AAP7987	Coleoptera	Carabidae
MACOL1589-12	AAP7987	Coleoptera	Carabidae
MACOL1860-12	AAP7987	Coleoptera	Carabidae
MACOL1866-12	AAP7987	Coleoptera	Carabidae
MACOL1876-12	AAP7987	Coleoptera	Carabidae
MACOL1898-12	AAP7987	Coleoptera	Carabidae
MACOL1904-12	AAP7987	Coleoptera	Carabidae
MACOL1908-12	AAP7987	Coleoptera	Carabidae
MACOL1913-12	AAP7987	Coleoptera	Carabidae
MACOL1916-12	AAP7987	Coleoptera	Carabidae
MACOL1920-12	AAP7987	Coleoptera	Carabidae
MACOL1923-12	AAP7987	Coleoptera	Carabidae
MACOL1924-12	AAP7987	Coleoptera	Carabidae
MACOL1934-12	AAP7987	Coleoptera	Carabidae
MACOL1937-12	AAP7987	Coleoptera	Carabidae
MACOL1938-12	AAP7987	Coleoptera	Carabidae
MACOL1943-12	AAP7987	Coleoptera	Carabidae
MACOL1945-12	AAP7987	Coleoptera	Carabidae
MACOL2377-12	AAP7987	Coleoptera	Carabidae
MACOL2381-12	AAP7987	Coleoptera	Carabidae
MACOL824-10	AAP7987	Coleoptera	Carabidae
MACOL1900-12	AAP7997	Coleoptera	Carabidae
MACOL2612-12	AAP7997	Coleoptera	Carabidae
MACOL2654-12	AAP7997	Coleoptera	Carabidae
MACOL904-10	AAP7997	Coleoptera	Carabidae
MACOL905-10	AAP7997	Coleoptera	Carabidae
MACOL906-10	AAP7998	Coleoptera	Carabidae
GMPBR303-18	AAP8000	Coleoptera	Carabidae
GMPBR416-18	AAP8000	Coleoptera	Carabidae
MACOL1588-12	AAP8000	Coleoptera	Carabidae
MACOL2595-12	AAP8000	Coleoptera	Carabidae
MACOL908-10	AAP8000	Coleoptera	Carabidae
MACOL911-10	AAP8002	Coleoptera	Carabidae
MACOL006-10	AAP8588	Coleoptera	Carabidae
MACOL007-10	AAP8588	Coleoptera	Carabidae
MACOL008-10	AAP8589	Coleoptera	Carabidae
MACOL445-10	AAP8613	Coleoptera	Carabidae
MACOL1544-11	AAP8614	Coleoptera	Carabidae
MACOL446-10	AAP8614	Coleoptera	Carabidae
MACOL1380-11	AAZ4389	Coleoptera	Carabidae
MACOL1381-11	AAZ4389	Coleoptera	Carabidae
MACOL1386-11	AAZ4390	Coleoptera	Carabidae
MACOL1387-11	AAZ4391	Coleoptera	Carabidae
MACOL476-10	AAZ4391	Coleoptera	Carabidae
MACOL1514-11	AAZ5748	Coleoptera	Carabidae
MACOL2125-12	AAZ5748	Coleoptera	Carabidae
MACOL2344-12	AAZ5748	Coleoptera	Carabidae
MACOL2345-12	AAZ5748	Coleoptera	Carabidae
MACOL2346-12	AAZ5748	Coleoptera	Carabidae
MACOL2105-12	ABA6323	Coleoptera	Carabidae
MACOL284-10	ABA6323	Coleoptera	Carabidae
MACOL1730-12	ABW8737	Coleoptera	Carabidae
MACOL1725-12	ABW8763	Coleoptera	Carabidae
MACOL1714-12	ABW8765	Coleoptera	Carabidae
MACOL1628-12	ABX0162	Coleoptera	Carabidae
MACOL2415-12	ABX0162	Coleoptera	Carabidae
MACOL2021-12	ABX6883	Coleoptera	Carabidae
MACOL1872-12	ABX9791	Coleoptera	Carabidae
MACOL285-10	ABZ8552	Coleoptera	Carabidae
MAMTJ865-12	ABZ8552	Coleoptera	Carabidae
PMNHB370-15	ABZ8552	Coleoptera	Carabidae
MAMTI1428-12	ABZ8713	Coleoptera	Carabidae
MAMTP1856-13	ABZ8713	Coleoptera	Carabidae
MACOL1867-12	ACF5705	Coleoptera	Carabidae
MACOL1871-12	ACF5705	Coleoptera	Carabidae
MACOL1914-12	ACF5705	Coleoptera	Carabidae
MACOL1946-12	ACF5705	Coleoptera	Carabidae
MACOL2466-12	ACF5705	Coleoptera	Carabidae
MACOL2642-12	ACF5705	Coleoptera	Carabidae
MAMTP1849-13	ACI9616	Coleoptera	Carabidae
PMNHL075-15	ACV4534	Coleoptera	Carabidae
PMNHL076-15	ACV4534	Coleoptera	Carabidae
MAMTQ250-14	ADD3782	Coleoptera	Carabidae
GMPBS091-18	ADS1960	Coleoptera	Carabidae
GMPBS097-18	ADS1960	Coleoptera	Carabidae
GMPBR045-18	ADU6525	Coleoptera	Carabidae
GMPQC788-19	ADZ8445	Coleoptera	Carabidae
GMPQC757-19	AEA0389	Coleoptera	Carabidae
GMPQI129-19	AEA0389	Coleoptera	Carabidae
MACOL046-10		Coleoptera	Carabidae
MACOL1724-12		Coleoptera	Carabidae
MACOL246-10		Coleoptera	Carabidae
MACOL479-10		Coleoptera	Carabidae
MACOL2060-12	ACA4227	Coleoptera	Cerambycidae	Cerambycinae	Ceresium
MACOL1484-11	AAZ5733	Coleoptera	Cerambycidae	Cerambycinae	Chlorophorus
MACOL063-10	AAP9018	Coleoptera	Cerambycidae	Cerambycinae	Stromatium
MACOL064-10	AAP9018	Coleoptera	Cerambycidae	Cerambycinae	Stromatium
MACOL065-10	AAP9018	Coleoptera	Cerambycidae	Cerambycinae	Stromatium
MACOL2054-12	AAP9018	Coleoptera	Cerambycidae	Cerambycinae	Stromatium
MACOL2055-12	AAP9018	Coleoptera	Cerambycidae	Cerambycinae	Stromatium
MACOL2056-12	AAP9018	Coleoptera	Cerambycidae	Cerambycinae	Stromatium
MACOL2057-12	AAP9018	Coleoptera	Cerambycidae	Cerambycinae	Stromatium
MACOL2058-12	AAP9018	Coleoptera	Cerambycidae	Cerambycinae	Stromatium
MACOL067-10	AED7857	Coleoptera	Cerambycidae	Cerambycinae	Stromatium
MACOL1485-11	AAH8082	Coleoptera	Cerambycidae	Cerambycinae	Trichoferus	Trichoferus campestris
MACOL051-10	AAP8597	Coleoptera	Cerambycidae	Cerambycinae
MACOL052-10	AAP8597	Coleoptera	Cerambycidae	Cerambycinae
MACOL2043-12	AAP8597	Coleoptera	Cerambycidae	Cerambycinae
MACOL2046-12	AAP8597	Coleoptera	Cerambycidae	Cerambycinae
MACOL053-10	AAP8598	Coleoptera	Cerambycidae	Cerambycinae
MACOL070-10	AAP8598	Coleoptera	Cerambycidae	Cerambycinae
MACOL2047-12	AAP8598	Coleoptera	Cerambycidae	Cerambycinae
MACOL062-10	AAP9017	Coleoptera	Cerambycidae	Cerambycinae
MACOL2347-12	AAP9017	Coleoptera	Cerambycidae	Cerambycinae
MACOL2348-12	AAP9017	Coleoptera	Cerambycidae	Cerambycinae
MACOL2349-12	AAP9017	Coleoptera	Cerambycidae	Cerambycinae
MACOL066-10	AAP9019	Coleoptera	Cerambycidae	Cerambycinae
MACOL1561-12	ABW2874	Coleoptera	Cerambycidae	Cerambycinae
MACOL1562-12	ABW2874	Coleoptera	Cerambycidae	Cerambycinae
MACOL1563-12	ABW2874	Coleoptera	Cerambycidae	Cerambycinae
MACOL1694-12	ABW8756	Coleoptera	Cerambycidae	Cerambycinae
MACOL2321-12	ABW8756	Coleoptera	Cerambycidae	Cerambycinae
MACOL2322-12	ABW8756	Coleoptera	Cerambycidae	Cerambycinae
MACOL071-10	ABY9904	Coleoptera	Cerambycidae	Cerambycinae
MACOL2323-12	ACB3510	Coleoptera	Cerambycidae	Cerambycinae
MACOL2972-13	ACI8623	Coleoptera	Cerambycidae	Cerambycinae
MACOL2949-13	ACI8822	Coleoptera	Cerambycidae	Cerambycinae
MACOL2849-13	ACI8903	Coleoptera	Cerambycidae	Cerambycinae
MACOL2850-13	ACI8903	Coleoptera	Cerambycidae	Cerambycinae
MACOL2851-13	ACI8903	Coleoptera	Cerambycidae	Cerambycinae
MACOL2852-13	ACI8903	Coleoptera	Cerambycidae	Cerambycinae
MACOL2853-13	ACI8903	Coleoptera	Cerambycidae	Cerambycinae
MACOL2854-13	ACI8903	Coleoptera	Cerambycidae	Cerambycinae
MACOL2855-13	ACI8903	Coleoptera	Cerambycidae	Cerambycinae
MACOL2856-13	ACI8903	Coleoptera	Cerambycidae	Cerambycinae
MACOL2857-13	ACI8903	Coleoptera	Cerambycidae	Cerambycinae
MACOL2858-13	ACI8903	Coleoptera	Cerambycidae	Cerambycinae
MACOL2859-13	ACI8903	Coleoptera	Cerambycidae	Cerambycinae
MACOL2860-13	ACI8903	Coleoptera	Cerambycidae	Cerambycinae
MACOL2861-13	ACI8903	Coleoptera	Cerambycidae	Cerambycinae
MACOL2862-13	ACI8903	Coleoptera	Cerambycidae	Cerambycinae
MACOL1488-11		Coleoptera	Cerambycidae	Cerambycinae
MACOL1697-12		Coleoptera	Cerambycidae	Cerambycinae
MACOL1698-12		Coleoptera	Cerambycidae	Cerambycinae
MACOL1699-12		Coleoptera	Cerambycidae	Cerambycinae
MACOL1700-12		Coleoptera	Cerambycidae	Cerambycinae
MACOL050-10	AAP9014	Coleoptera	Cerambycidae	Lamiinae	Apriona
MACOL2281-12	AAQ1952	Coleoptera	Cerambycidae	Lamiinae	Batocera	Batocera granulipennis
MACOL593-10	AAP7943	Coleoptera	Cerambycidae	Lamiinae
MACOL056-10	AAP9015	Coleoptera	Cerambycidae	Lamiinae
MACOL057-10	AAP9015	Coleoptera	Cerambycidae	Lamiinae
MACOL058-10	AAP9015	Coleoptera	Cerambycidae	Lamiinae
MACOL059-10	AAP9015	Coleoptera	Cerambycidae	Lamiinae
MACOL060-10	AAP9015	Coleoptera	Cerambycidae	Lamiinae
MACOL061-10	AAP9016	Coleoptera	Cerambycidae	Lamiinae
MACOL2062-12	AAP9016	Coleoptera	Cerambycidae	Lamiinae
MACOL1464-11	AAZ5725	Coleoptera	Cerambycidae	Lamiinae
MACOL1465-11	AAZ5726	Coleoptera	Cerambycidae	Lamiinae
MACOL2863-13	ACI8683	Coleoptera	Cerambycidae	Lamiinae
MACOL2864-13	ACI8683	Coleoptera	Cerambycidae	Lamiinae
MACOL2992-13	ACI8753	Coleoptera	Cerambycidae	Lamiinae
MACOL2973-13	ACI8819	Coleoptera	Cerambycidae	Lamiinae
MACOL2952-13	ACI8823	Coleoptera	Cerambycidae	Lamiinae
MAMTS274-14	ACI8823	Coleoptera	Cerambycidae	Lamiinae
MAMTP1837-13	ACI9277	Coleoptera	Cerambycidae	Lamiinae
MAMTS277-14	ACI9277	Coleoptera	Cerambycidae	Lamiinae
MACOL1611-12	ABX0145	Coleoptera	Cerambycidae	Prioninae	Priotyrannus
MACOL1616-12	ABX0145	Coleoptera	Cerambycidae	Prioninae	Priotyrannus
MACOL1754-12		Coleoptera	Cerambycidae	Prioninae	Priotyrannus
MACOL1479-11	AAZ5731	Coleoptera	Cerambycidae	Prioninae
MACOL1480-11	AAZ5731	Coleoptera	Cerambycidae	Prioninae
MACOL1481-11	AAZ5731	Coleoptera	Cerambycidae	Prioninae
MACOL1482-11	AAZ5731	Coleoptera	Cerambycidae	Prioninae
MACOL1492-11	AAZ5738	Coleoptera	Cerambycidae	Prioninae
MACOL2279-12	ACB3659	Coleoptera	Cerambycidae	Prioninae
MACOL2280-12	ACB3831	Coleoptera	Cerambycidae	Prioninae
MACOL054-10		Coleoptera	Cerambycidae	Prioninae
MACOL2059-12	ACA4228	Coleoptera	Cerambycidae	Spondylidinae	Arhopalus
MACOL1483-11	AAZ5732	Coleoptera	Cerambycidae
MACOL1486-11	AAZ5734	Coleoptera	Cerambycidae
MACOL1487-11	AAZ5734	Coleoptera	Cerambycidae
MACOL1489-11	AAZ5735	Coleoptera	Cerambycidae
MACOL1490-11	AAZ5736	Coleoptera	Cerambycidae
MACOL1552-11	AAZ5760	Coleoptera	Cerambycidae
MACOL2865-13	ACI8684	Coleoptera	Cerambycidae
GMPBK2621-18	ADV6690	Coleoptera	Cerambycidae
MACOL1458-11		Coleoptera	Cerambycidae
MACOL1531-11		Coleoptera	Cerambycidae
MACOL1549-11		Coleoptera	Cerambycidae
MACOL1564-12		Coleoptera	Cerambycidae
MACOL1565-12		Coleoptera	Cerambycidae
MACOL660-10		Coleoptera	Cerambycidae
MASGI404-15		Coleoptera	Chrysomelidae	Bruchinae	Callosobruchus	Callosobruchus maculatus
MACOL407-10	ABW1300	Coleoptera	Chrysomelidae	Cassidinae	Cassida
MAMTQ025-14	ABW1300	Coleoptera	Chrysomelidae	Cassidinae	Cassida
MACOL792-10	AAU6881	Coleoptera	Chrysomelidae	Cassidinae	Dicladispa	Dicladispa armigera
MAMTP1668-13	AAU6881	Coleoptera	Chrysomelidae	Cassidinae	Dicladispa	Dicladispa armigera
MAMTP1669-13	AAU6881	Coleoptera	Chrysomelidae	Cassidinae	Dicladispa	Dicladispa armigera
MAMTP1715-13	AAU6881	Coleoptera	Chrysomelidae	Cassidinae	Dicladispa	Dicladispa armigera
MAMTQ238-14	AAU6881	Coleoptera	Chrysomelidae	Cassidinae	Dicladispa	Dicladispa armigera
MAMTS204-14	AAU6881	Coleoptera	Chrysomelidae	Cassidinae	Dicladispa	Dicladispa armigera
PMNHE470-15	AAU6881	Coleoptera	Chrysomelidae	Cassidinae	Dicladispa	Dicladispa armigera
PMNHE471-15		Coleoptera	Chrysomelidae	Cassidinae	Dicladispa	Dicladispa armigera
MACOL820-10	ABY3477	Coleoptera	Chrysomelidae	Cassidinae	Dicladispa
MACOL1524-11	AAZ5753	Coleoptera	Chrysomelidae	Chrysomelinae	Entomoscelis
MACOL1525-11	AAZ5753	Coleoptera	Chrysomelidae	Chrysomelinae	Entomoscelis
MACOL1526-11	AAZ5753	Coleoptera	Chrysomelidae	Chrysomelinae	Entomoscelis
MACOL1527-11	AAZ5753	Coleoptera	Chrysomelidae	Chrysomelinae	Entomoscelis
MACOL412-10	AAG4477	Coleoptera	Chrysomelidae	Chrysomelinae	Plagiodera	Plagiodera versicolora
MACOL413-10	AAG4477	Coleoptera	Chrysomelidae	Chrysomelinae	Plagiodera	Plagiodera versicolora
MACOL889-10	AAG4477	Coleoptera	Chrysomelidae	Chrysomelinae	Plagiodera	Plagiodera versicolora
MACOL400-10	AAP8603	Coleoptera	Chrysomelidae	Chrysomelinae	Zygogramma	Zygogramma bicolorata
MACOL438-10	AAP8603	Coleoptera	Chrysomelidae	Chrysomelinae	Zygogramma	Zygogramma bicolorata
MACOL439-10	AAP8603	Coleoptera	Chrysomelidae	Chrysomelinae	Zygogramma	Zygogramma bicolorata
MACOL440-10	AAP8603	Coleoptera	Chrysomelidae	Chrysomelinae	Zygogramma	Zygogramma bicolorata
MACOL441-10	AAP8603	Coleoptera	Chrysomelidae	Chrysomelinae	Zygogramma	Zygogramma bicolorata
MACOL442-10	AAP8603	Coleoptera	Chrysomelidae	Chrysomelinae	Zygogramma	Zygogramma bicolorata
MACOL398-10		Coleoptera	Chrysomelidae	Chrysomelinae	Zygogramma	Zygogramma bicolorata
MACOL2600-12	AAP7975	Coleoptera	Chrysomelidae	Eumolpinae	Pachnephorus	Pachnephorus pilosus
MACOL787-10	AAP7975	Coleoptera	Chrysomelidae	Eumolpinae	Pachnephorus	Pachnephorus pilosus
MACOL804-10	AAP7975	Coleoptera	Chrysomelidae	Eumolpinae	Pachnephorus	Pachnephorus pilosus
MACOL811-10	AAP7975	Coleoptera	Chrysomelidae	Eumolpinae	Pachnephorus	Pachnephorus pilosus
MAMTP1730-13	AAP7975	Coleoptera	Chrysomelidae	Eumolpinae	Pachnephorus	Pachnephorus pilosus
MACOL1732-12	AAP8616	Coleoptera	Chrysomelidae	Galerucinae	Altica
MACOL1835-12	AAP8616	Coleoptera	Chrysomelidae	Galerucinae	Altica
MACOL1836-12	AAP8616	Coleoptera	Chrysomelidae	Galerucinae	Altica
MACOL1837-12	AAP8616	Coleoptera	Chrysomelidae	Galerucinae	Altica
MACOL2008-12	AAP8616	Coleoptera	Chrysomelidae	Galerucinae	Altica
MACOL2009-12	AAP8616	Coleoptera	Chrysomelidae	Galerucinae	Altica
MACOL2010-12	AAP8616	Coleoptera	Chrysomelidae	Galerucinae	Altica
MACOL2011-12	AAP8616	Coleoptera	Chrysomelidae	Galerucinae	Altica
MACOL2012-12	AAP8616	Coleoptera	Chrysomelidae	Galerucinae	Altica
MACOL2013-12	AAP8616	Coleoptera	Chrysomelidae	Galerucinae	Altica
MACOL2014-12	AAP8616	Coleoptera	Chrysomelidae	Galerucinae	Altica
MACOL2207-12	AAP8616	Coleoptera	Chrysomelidae	Galerucinae	Altica
MACOL456-10	AAP8616	Coleoptera	Chrysomelidae	Galerucinae	Altica
MACOL457-10	AAP8616	Coleoptera	Chrysomelidae	Galerucinae	Altica
MACOL458-10	AAP8616	Coleoptera	Chrysomelidae	Galerucinae	Altica
MACOL459-10	AAP8616	Coleoptera	Chrysomelidae	Galerucinae	Altica
MACOL945-10	AAP8616	Coleoptera	Chrysomelidae	Galerucinae	Altica
MACOL455-10		Coleoptera	Chrysomelidae	Galerucinae	Altica
MACOL1533-11	AAP7937	Coleoptera	Chrysomelidae	Galerucinae	Aulacophora	Aulacophora indica
MACOL1742-12	AAP7937	Coleoptera	Chrysomelidae	Galerucinae	Aulacophora	Aulacophora indica
MACOL1841-12	AAP7937	Coleoptera	Chrysomelidae	Galerucinae	Aulacophora	Aulacophora indica
MACOL579-10	AAP7937	Coleoptera	Chrysomelidae	Galerucinae	Aulacophora	Aulacophora indica
MACOL580-10	AAP7937	Coleoptera	Chrysomelidae	Galerucinae	Aulacophora	Aulacophora indica
MACOL581-10	AAP7937	Coleoptera	Chrysomelidae	Galerucinae	Aulacophora	Aulacophora indica
MACOL582-10	AAP7937	Coleoptera	Chrysomelidae	Galerucinae	Aulacophora	Aulacophora indica
MACOL583-10	AAP7937	Coleoptera	Chrysomelidae	Galerucinae	Aulacophora	Aulacophora indica
MACOL584-10	AAP7937	Coleoptera	Chrysomelidae	Galerucinae	Aulacophora	Aulacophora indica
MACOL585-10	AAP7937	Coleoptera	Chrysomelidae	Galerucinae	Aulacophora	Aulacophora indica
MACOL757-10	AAP7937	Coleoptera	Chrysomelidae	Galerucinae	Aulacophora	Aulacophora indica
MACOL875-10	AAP7937	Coleoptera	Chrysomelidae	Galerucinae	Aulacophora	Aulacophora indica
MACOL876-10	AAP7937	Coleoptera	Chrysomelidae	Galerucinae	Aulacophora	Aulacophora indica
MACOL877-10	AAP7937	Coleoptera	Chrysomelidae	Galerucinae	Aulacophora	Aulacophora indica
MAIMB084-09	AAP7937	Coleoptera	Chrysomelidae	Galerucinae	Aulacophora	Aulacophora indica
MAMTJ864-12	AAP7937	Coleoptera	Chrysomelidae	Galerucinae	Aulacophora	Aulacophora indica
MAMTP1820-13	AAP7937	Coleoptera	Chrysomelidae	Galerucinae	Aulacophora	Aulacophora indica
MAMTP1821-13	AAP7937	Coleoptera	Chrysomelidae	Galerucinae	Aulacophora	Aulacophora indica
MACOL382-10	AAP7992	Coleoptera	Chrysomelidae	Galerucinae	Aulacophora	Aulacophora lewisii
MACOL878-10	AAP7992	Coleoptera	Chrysomelidae	Galerucinae	Aulacophora	Aulacophora lewisii
MACOL879-10	AAP7992	Coleoptera	Chrysomelidae	Galerucinae	Aulacophora	Aulacophora lewisii
MAMTG892-12	ABZ9838	Coleoptera	Chrysomelidae	Galerucinae	Chaetocnema	Chaetocnema aridula
MACOL2444-12		Coleoptera	Chrysomelidae	Galerucinae	Chaetocnema	Chaetocnema hortensis
GMPBH458-18	ADL5838	Coleoptera	Chrysomelidae	Galerucinae	Chaetocnema
MACOL1838-12	ABX7703	Coleoptera	Chrysomelidae	Galerucinae	Galerucella	Galerucella grisescens
MACOL1840-12	ABX7703	Coleoptera	Chrysomelidae	Galerucinae	Galerucella	Galerucella grisescens
MACOL1848-12	AAP7977	Coleoptera	Chrysomelidae	Galerucinae	Monolepta	Monolepta quadriguttata
MACOL1849-12	AAP7977	Coleoptera	Chrysomelidae	Galerucinae	Monolepta	Monolepta quadriguttata
MACOL393-10	AAP7977	Coleoptera	Chrysomelidae	Galerucinae	Monolepta	Monolepta quadriguttata
MACOL394-10	AAP7977	Coleoptera	Chrysomelidae	Galerucinae	Monolepta	Monolepta quadriguttata
MACOL395-10	AAP7977	Coleoptera	Chrysomelidae	Galerucinae	Monolepta	Monolepta quadriguttata
MACOL396-10	AAP7977	Coleoptera	Chrysomelidae	Galerucinae	Monolepta	Monolepta quadriguttata
MACOL798-10	AAP7977	Coleoptera	Chrysomelidae	Galerucinae	Monolepta	Monolepta quadriguttata
MACOL810-10	AAP7977	Coleoptera	Chrysomelidae	Galerucinae	Monolepta	Monolepta quadriguttata
MACOL855-10	AAP7977	Coleoptera	Chrysomelidae	Galerucinae	Monolepta	Monolepta quadriguttata
MACOL856-10	AAP7977	Coleoptera	Chrysomelidae	Galerucinae	Monolepta	Monolepta quadriguttata
MACOL857-10	AAP7977	Coleoptera	Chrysomelidae	Galerucinae	Monolepta	Monolepta quadriguttata
GMPQE1325-19	ADL9790	Coleoptera	Chrysomelidae	Galerucinae	Phyllotreta	Phyllotreta erysimi
MACOL558-10	AAP7929	Coleoptera	Chrysomelidae
MACOL559-10	AAP7929	Coleoptera	Chrysomelidae
MACOL560-10	AAP7929	Coleoptera	Chrysomelidae
MACOL653-10	AAP7929	Coleoptera	Chrysomelidae
MACOL870-10	AAP7929	Coleoptera	Chrysomelidae
MACOL871-10	AAP7929	Coleoptera	Chrysomelidae
MACOL872-10	AAP7929	Coleoptera	Chrysomelidae
MACOL873-10	AAP7929	Coleoptera	Chrysomelidae
MACOL874-10	AAP7929	Coleoptera	Chrysomelidae
MACOL901-10	AAP7929	Coleoptera	Chrysomelidae
MACOL922-10	AAP7929	Coleoptera	Chrysomelidae
MACOL923-10	AAP7929	Coleoptera	Chrysomelidae
MACOL2983-13	AAP7930	Coleoptera	Chrysomelidae
MACOL562-10	AAP7930	Coleoptera	Chrysomelidae
MACOL563-10	AAP7930	Coleoptera	Chrysomelidae
MAMTP1827-13	AAP7930	Coleoptera	Chrysomelidae
MAMTP1842-13	AAP7930	Coleoptera	Chrysomelidae
MAMTP1845-13	AAP7930	Coleoptera	Chrysomelidae
PMNHD1392-15	AAP7930	Coleoptera	Chrysomelidae
MACOL564-10	AAP7931	Coleoptera	Chrysomelidae
MACOL565-10	AAP7931	Coleoptera	Chrysomelidae
MACOL2984-13	AAP7932	Coleoptera	Chrysomelidae
MACOL566-10	AAP7932	Coleoptera	Chrysomelidae
MACOL567-10	AAP7932	Coleoptera	Chrysomelidae
MACOL568-10	AAP7932	Coleoptera	Chrysomelidae
MACOL569-10	AAP7932	Coleoptera	Chrysomelidae
MACOL570-10	AAP7932	Coleoptera	Chrysomelidae
MACOL654-10	AAP7932	Coleoptera	Chrysomelidae
MACOL587-10	AAP7939	Coleoptera	Chrysomelidae
MACOL588-10	AAP7939	Coleoptera	Chrysomelidae
MACOL594-10	AAP7944	Coleoptera	Chrysomelidae
MACOL763-10	AAP7967	Coleoptera	Chrysomelidae
MACOL779-10	AAP7970	Coleoptera	Chrysomelidae
MACOL782-10	AAP7972	Coleoptera	Chrysomelidae
MACOL812-10	AAP7983	Coleoptera	Chrysomelidae
MACOL1534-11	AAP7993	Coleoptera	Chrysomelidae
MACOL881-10	AAP7993	Coleoptera	Chrysomelidae
MACOL421-10	AAP7994	Coleoptera	Chrysomelidae
MACOL891-10	AAP7994	Coleoptera	Chrysomelidae
MACOL892-10	AAP7994	Coleoptera	Chrysomelidae
MACOL893-10	AAP7994	Coleoptera	Chrysomelidae
MACOL915-10	AAP8005	Coleoptera	Chrysomelidae
MACOL924-10	AAP8008	Coleoptera	Chrysomelidae
MACOL387-10	AAP8600	Coleoptera	Chrysomelidae
MACOL388-10	AAP8600	Coleoptera	Chrysomelidae
MACOL389-10	AAP8600	Coleoptera	Chrysomelidae
MACOL3018-13	AAP8605	Coleoptera	Chrysomelidae
MACOL402-10	AAP8605	Coleoptera	Chrysomelidae
MACOL403-10	AAP8605	Coleoptera	Chrysomelidae
MACOL882-10	AAP8605	Coleoptera	Chrysomelidae
MACOL883-10	AAP8605	Coleoptera	Chrysomelidae
MACOL2995-13	AAP8606	Coleoptera	Chrysomelidae
MACOL406-10	AAP8606	Coleoptera	Chrysomelidae
MAMTP1861-13	AAP8606	Coleoptera	Chrysomelidae
MAMTP1867-13	AAP8606	Coleoptera	Chrysomelidae
MACOL408-10	AAP8607	Coleoptera	Chrysomelidae
MACOL409-10	AAP8607	Coleoptera	Chrysomelidae
MACOL410-10	AAP8607	Coleoptera	Chrysomelidae
MACOL411-10	AAP8607	Coleoptera	Chrysomelidae
MACOL821-10	AAP8607	Coleoptera	Chrysomelidae
MACOL468-10	AAP8619	Coleoptera	Chrysomelidae
MACOL469-10	AAP8619	Coleoptera	Chrysomelidae
MACOL470-10	AAP8619	Coleoptera	Chrysomelidae
MACOL471-10	AAP8619	Coleoptera	Chrysomelidae
MACOL472-10	AAP8619	Coleoptera	Chrysomelidae
MAMTQ015-14	AAP8619	Coleoptera	Chrysomelidae
MAMTQ016-14	AAP8619	Coleoptera	Chrysomelidae
MAMTQ017-14	AAP8619	Coleoptera	Chrysomelidae
MAMTQ019-14	AAP8619	Coleoptera	Chrysomelidae
MAMTQ020-14	AAP8619	Coleoptera	Chrysomelidae
MAMTQ022-14	AAP8619	Coleoptera	Chrysomelidae
MAMTQ024-14	AAP8619	Coleoptera	Chrysomelidae
MAMTR120-14	AAP8619	Coleoptera	Chrysomelidae
PMNHD1386-15	AAP8619	Coleoptera	Chrysomelidae
PMNHG003-15	AAP8619	Coleoptera	Chrysomelidae
MACOL1473-11	AAZ5729	Coleoptera	Chrysomelidae
MACOL1474-11	AAZ5730	Coleoptera	Chrysomelidae
MACOL1475-11	AAZ5730	Coleoptera	Chrysomelidae
MACOL1476-11	AAZ5730	Coleoptera	Chrysomelidae
MACOL1477-11	AAZ5730	Coleoptera	Chrysomelidae
MACOL1478-11	AAZ5730	Coleoptera	Chrysomelidae
MACOL1540-11	AAZ5756	Coleoptera	Chrysomelidae
MACOL2936-13	ABV1609	Coleoptera	Chrysomelidae
MACOL2937-13	ABV1609	Coleoptera	Chrysomelidae
MACOL2938-13	ABV1609	Coleoptera	Chrysomelidae
MACOL2939-13	ABV1609	Coleoptera	Chrysomelidae
MACOL2940-13	ABV1609	Coleoptera	Chrysomelidae
MACOL2974-13	ABV1609	Coleoptera	Chrysomelidae
MACOL2975-13	ABV1609	Coleoptera	Chrysomelidae
MACOL2976-13	ABV1609	Coleoptera	Chrysomelidae
MACOL2977-13	ABV1609	Coleoptera	Chrysomelidae
MACOL2978-13	ABV1609	Coleoptera	Chrysomelidae
MACOL2979-13	ABV1609	Coleoptera	Chrysomelidae
MACOL2980-13	ABV1609	Coleoptera	Chrysomelidae
MACOL605-10	ABV1609	Coleoptera	Chrysomelidae
MACOL599-10	ABV1611	Coleoptera	Chrysomelidae
MACOL1459-11	ABW2810	Coleoptera	Chrysomelidae
MACOL1743-12	ABW8743	Coleoptera	Chrysomelidae
MACOL1744-12	ABW8743	Coleoptera	Chrysomelidae
MACOL1745-12	ABW8743	Coleoptera	Chrysomelidae
MACOL1746-12	ABW8744	Coleoptera	Chrysomelidae
MACOL1581-12	ABX0159	Coleoptera	Chrysomelidae
MAMTG055-12	ABX2091	Coleoptera	Chrysomelidae
PMNHE477-15	ABX2091	Coleoptera	Chrysomelidae
MACOL3033-13	ABX2095	Coleoptera	Chrysomelidae
MACOL890-10	ABX2095	Coleoptera	Chrysomelidae
MAMTF1033-12	ABX2095	Coleoptera	Chrysomelidae
MAMTN694-13	ABX2095	Coleoptera	Chrysomelidae
MAMTC214-12	ABX2105	Coleoptera	Chrysomelidae
MAMTI1453-12	ABX2105	Coleoptera	Chrysomelidae
MAMTI1462-12	ABX2105	Coleoptera	Chrysomelidae
MAMTP1707-13	ABX2105	Coleoptera	Chrysomelidae
MAMTW328-14	ABX2105	Coleoptera	Chrysomelidae
PMNHJ077-15	ABX2105	Coleoptera	Chrysomelidae
MAMTB1010-12	ABX2107	Coleoptera	Chrysomelidae
MAMTA1473-12	ABX2108	Coleoptera	Chrysomelidae
MACOL1851-12	ABX7335	Coleoptera	Chrysomelidae
MACOL2038-12	ABX7335	Coleoptera	Chrysomelidae
MACOL2039-12	ABX7335	Coleoptera	Chrysomelidae
MAMTI1455-12	ABZ8709	Coleoptera	Chrysomelidae
MAMTI1463-12	ABZ8711	Coleoptera	Chrysomelidae
PMNHB306-15	ABZ8711	Coleoptera	Chrysomelidae
MAMTK559-12	ABZ8966	Coleoptera	Chrysomelidae
MACOL2136-12	ACA4186	Coleoptera	Chrysomelidae
MACOL2394-12	ACB7698	Coleoptera	Chrysomelidae
MACOL2405-12	ACB7698	Coleoptera	Chrysomelidae
MACOL2382-12	ACB8401	Coleoptera	Chrysomelidae
PMNHI183-15	ACB8401	Coleoptera	Chrysomelidae
MACOL2621-12	ACC5088	Coleoptera	Chrysomelidae
MAMTP1646-13	ACF6359	Coleoptera	Chrysomelidae
MAMTP1666-13	ACF6359	Coleoptera	Chrysomelidae
MAMTP1868-13	ACF6359	Coleoptera	Chrysomelidae
MAMTR100-14	ACF6359	Coleoptera	Chrysomelidae
MAMTP1648-13	ACF6792	Coleoptera	Chrysomelidae
MAMTP1652-13	ACF6792	Coleoptera	Chrysomelidae
MAMTP1653-13	ACF6792	Coleoptera	Chrysomelidae
MAMTP1655-13	ACF6792	Coleoptera	Chrysomelidae
MAMTP1657-13	ACF6792	Coleoptera	Chrysomelidae
MAMTP1659-13	ACF6792	Coleoptera	Chrysomelidae
MAMTP1661-13	ACF6792	Coleoptera	Chrysomelidae
MAMTP1662-13	ACF6792	Coleoptera	Chrysomelidae
MAMTP1663-13	ACF6792	Coleoptera	Chrysomelidae
MAMTP1667-13	ACF6792	Coleoptera	Chrysomelidae
MAMTP1672-13	ACF6792	Coleoptera	Chrysomelidae
MAMTP1673-13	ACF6792	Coleoptera	Chrysomelidae
MAMTP1675-13	ACF6792	Coleoptera	Chrysomelidae
MAMTP1676-13	ACF6792	Coleoptera	Chrysomelidae
MAMTP1677-13	ACF6792	Coleoptera	Chrysomelidae
MAMTP1679-13	ACF6792	Coleoptera	Chrysomelidae
MAMTP1680-13	ACF6792	Coleoptera	Chrysomelidae
MAMTP1688-13	ACF6792	Coleoptera	Chrysomelidae
MAMTP1690-13	ACF6792	Coleoptera	Chrysomelidae
MAMTP1691-13	ACF6792	Coleoptera	Chrysomelidae
MAMTP1692-13	ACF6792	Coleoptera	Chrysomelidae
MAMTP1693-13	ACF6792	Coleoptera	Chrysomelidae
MAMTP1697-13	ACF6792	Coleoptera	Chrysomelidae
MAMTP1698-13	ACF6792	Coleoptera	Chrysomelidae
MAMTP1714-13	ACF6792	Coleoptera	Chrysomelidae
MAMTP1727-13	ACF6792	Coleoptera	Chrysomelidae
MAMTQ244-14	ACF6792	Coleoptera	Chrysomelidae
MAMTS209-14	ACF6792	Coleoptera	Chrysomelidae
MAMTS213-14	ACF6792	Coleoptera	Chrysomelidae
PMNHG115-15	ACF6792	Coleoptera	Chrysomelidae
MAMTO287-13	ACF8913	Coleoptera	Chrysomelidae
MAMTO291-13	ACF8913	Coleoptera	Chrysomelidae
MAMTO292-13	ACF8913	Coleoptera	Chrysomelidae
PMNHA579-14	ACF8913	Coleoptera	Chrysomelidae
PMNHB063-14	ACF8913	Coleoptera	Chrysomelidae
PMNHC147-15	ACF8913	Coleoptera	Chrysomelidae
PMNHD961-15	ACF8913	Coleoptera	Chrysomelidae
PMNHE479-15	ACF8913	Coleoptera	Chrysomelidae
PMNHE487-15	ACF8913	Coleoptera	Chrysomelidae
PMNHE493-15	ACF8913	Coleoptera	Chrysomelidae
PMNHJ076-15	ACF8913	Coleoptera	Chrysomelidae
MAMTN446-13	ACG6151	Coleoptera	Chrysomelidae
GMPBD091-18	ACG6153	Coleoptera	Chrysomelidae
MAMTN439-13	ACG6153	Coleoptera	Chrysomelidae
MAMTN436-13	ACG6154	Coleoptera	Chrysomelidae
MAMTV128-14	ACG6154	Coleoptera	Chrysomelidae
MAMTW252-14	ACG6154	Coleoptera	Chrysomelidae
PMNHJ083-15	ACG6154	Coleoptera	Chrysomelidae
PMNHJ094-15	ACG6154	Coleoptera	Chrysomelidae
PMNHN420-15	ACG6154	Coleoptera	Chrysomelidae
MAMTN449-13	ACG6341	Coleoptera	Chrysomelidae
PMNHA328-14	ACG6341	Coleoptera	Chrysomelidae
PMNHC152-15	ACG6341	Coleoptera	Chrysomelidae
MACOL3020-13	ACI8756	Coleoptera	Chrysomelidae
MACOL3019-13	ACI8757	Coleoptera	Chrysomelidae
MACOL3005-13	ACI8758	Coleoptera	Chrysomelidae
MACOL3006-13	ACI8758	Coleoptera	Chrysomelidae
MACOL3007-13	ACI8758	Coleoptera	Chrysomelidae
MACOL3008-13	ACI8758	Coleoptera	Chrysomelidae
MACOL3010-13	ACI8758	Coleoptera	Chrysomelidae
MACOL3011-13	ACI8758	Coleoptera	Chrysomelidae
MACOL3012-13	ACI8758	Coleoptera	Chrysomelidae
MACOL3013-13	ACI8758	Coleoptera	Chrysomelidae
MACOL3014-13	ACI8758	Coleoptera	Chrysomelidae
MACOL3015-13	ACI8758	Coleoptera	Chrysomelidae
MACOL3016-13	ACI8758	Coleoptera	Chrysomelidae
MACOL3017-13	ACI8758	Coleoptera	Chrysomelidae
MACOL3002-13	ACI8759	Coleoptera	Chrysomelidae
MACOL2943-13	ACI8824	Coleoptera	Chrysomelidae
MACOL2985-13	ACM1805	Coleoptera	Chrysomelidae
GMPBI221-18	ACN5701	Coleoptera	Chrysomelidae
MAMTV126-14	ACP3913	Coleoptera	Chrysomelidae
MAMTV114-14	ACP3914	Coleoptera	Chrysomelidae
MAMTX193-14	ACP4041	Coleoptera	Chrysomelidae
MAMTS208-14	ACP4107	Coleoptera	Chrysomelidae
MAMTY338-14	ACP6031	Coleoptera	Chrysomelidae
MAMTY336-14	ACP6250	Coleoptera	Chrysomelidae
MAMTY342-14	ACP6250	Coleoptera	Chrysomelidae
MAMTY344-14	ACP6250	Coleoptera	Chrysomelidae
MAMTY345-14	ACP6250	Coleoptera	Chrysomelidae
PMNHL073-15	ACP6250	Coleoptera	Chrysomelidae
PMNHN319-15	ACP6250	Coleoptera	Chrysomelidae
PMNHA564-14	ACS4254	Coleoptera	Chrysomelidae
PMNHC150-15	ACU7510	Coleoptera	Chrysomelidae
PMNHF325-15	ACU7510	Coleoptera	Chrysomelidae
PMNHE489-15	ACV0163	Coleoptera	Chrysomelidae
PMNHI126-15	ACV2361	Coleoptera	Chrysomelidae
PMNHJ086-15	ACV2693	Coleoptera	Chrysomelidae
PMNHJ089-15	ACV2693	Coleoptera	Chrysomelidae
MAMTP1645-13	ADD2537	Coleoptera	Chrysomelidae
PMNHA566-14	ADD2686	Coleoptera	Chrysomelidae
GMPBH499-18	ADT0951	Coleoptera	Chrysomelidae
GMPBJ201-18	ADT0951	Coleoptera	Chrysomelidae
GMPBK109-18	ADT0951	Coleoptera	Chrysomelidae
GMPBL130-18	ADU4723	Coleoptera	Chrysomelidae
GMPBH178-18	ADU9957	Coleoptera	Chrysomelidae
GMPBI098-18	ADV4185	Coleoptera	Chrysomelidae
GMPBK2433-18	ADV4185	Coleoptera	Chrysomelidae
GMPQC104-19	AEA0157	Coleoptera	Chrysomelidae
GMPQC762-19	AEA0157	Coleoptera	Chrysomelidae
GMPQC742-19	AEA0915	Coleoptera	Chrysomelidae
GMPQC743-19	AEA0915	Coleoptera	Chrysomelidae
GMPQC744-19	AEA0915	Coleoptera	Chrysomelidae
GMPQC746-19	AEA0915	Coleoptera	Chrysomelidae
GMPQC787-19	AEA0915	Coleoptera	Chrysomelidae
GMPQC793-19	AEA0915	Coleoptera	Chrysomelidae
GMPQE1335-19	AEA0915	Coleoptera	Chrysomelidae
GMPQE1342-19	AEA0915	Coleoptera	Chrysomelidae
GMPQI103-19	AEA1217	Coleoptera	Chrysomelidae
GMPQI810-19	AEA1217	Coleoptera	Chrysomelidae
GMPQC730-19	AEA2509	Coleoptera	Chrysomelidae
GMPQC734-19	AEA2509	Coleoptera	Chrysomelidae
GMPQC736-19	AEA2509	Coleoptera	Chrysomelidae
GMPQC737-19	AEA2509	Coleoptera	Chrysomelidae
GMPQC751-19	AEA2509	Coleoptera	Chrysomelidae
GMPQE1320-19	AEA2509	Coleoptera	Chrysomelidae
GMPQE1339-19	AEA2509	Coleoptera	Chrysomelidae
GMPQE1317-19	AEA2786	Coleoptera	Chrysomelidae
GMPQI110-19	AEA2786	Coleoptera	Chrysomelidae
GMPQI120-19	AEA2786	Coleoptera	Chrysomelidae
MACOL1542-11		Coleoptera	Chrysomelidae
MACOL1573-12		Coleoptera	Chrysomelidae
MACOL1580-12		Coleoptera	Chrysomelidae
MACOL1600-12		Coleoptera	Chrysomelidae
MACOL1735-12		Coleoptera	Chrysomelidae
MACOL1917-12		Coleoptera	Chrysomelidae
MACOL399-10		Coleoptera	Chrysomelidae
MACOL404-10		Coleoptera	Chrysomelidae
MACOL773-10		Coleoptera	Chrysomelidae
MACOL795-10		Coleoptera	Chrysomelidae
MACOL916-10		Coleoptera	Chrysomelidae
PMNHE288-15		Coleoptera	Chrysomelidae
MACOL1643-12	ABX0152	Coleoptera	Cleridae
MAMTP1843-13	ACI9566	Coleoptera	Cleridae
MACOL1756-12	ADD7635	Coleoptera	Cleridae
MACOL1353-11	ABA3373	Coleoptera	Coccinellidae	Coccinellinae	Afidentula	Afidentula manderstgerni
MACOL1350-11	ABA3374	Coleoptera	Coccinellidae	Coccinellinae	Afidentula	Afidentula manderstgerni
MACOL1352-11	ABA3374	Coleoptera	Coccinellidae	Coccinellinae	Afidentula	Afidentula manderstgerni
MACOL2931-13	ABA3374	Coleoptera	Coccinellidae	Coccinellinae	Afidentula	Afidentula manderstgerni
MACOL2932-13	ABA3374	Coleoptera	Coccinellidae	Coccinellinae	Afidentula	Afidentula manderstgerni
MACOL2933-13	ABA3374	Coleoptera	Coccinellidae	Coccinellinae	Afidentula	Afidentula manderstgerni
MACOL2934-13	ABA3374	Coleoptera	Coccinellidae	Coccinellinae	Afidentula	Afidentula manderstgerni
MACOL2935-13	ABA3374	Coleoptera	Coccinellidae	Coccinellinae	Afidentula	Afidentula manderstgerni
MACOL517-10	AAP7922	Coleoptera	Coccinellidae	Coccinellinae	Aiolocaria	Aiolocaria hexaspilota
MACOL1320-11	AAP7978	Coleoptera	Coccinellidae	Coccinellinae	Anegleis	Anegleis cardoni
MACOL1321-11	AAP7978	Coleoptera	Coccinellidae	Coccinellinae	Anegleis	Anegleis cardoni
MACOL800-10	AAP7978	Coleoptera	Coccinellidae	Coccinellinae	Anegleis	Anegleis cardoni
GMPBK2426-18	AAP7925	Coleoptera	Coccinellidae	Coccinellinae	Brumoides	Brumoides suturalis
GMPBP013-18	AAP7925	Coleoptera	Coccinellidae	Coccinellinae	Brumoides	Brumoides suturalis
GMPBX017-18	AAP7925	Coleoptera	Coccinellidae	Coccinellinae	Brumoides	Brumoides suturalis
GMPBY020-18	AAP7925	Coleoptera	Coccinellidae	Coccinellinae	Brumoides	Brumoides suturalis
MACOL529-10	AAP7925	Coleoptera	Coccinellidae	Coccinellinae	Brumoides	Brumoides suturalis
MACOL530-10	AAP7925	Coleoptera	Coccinellidae	Coccinellinae	Brumoides	Brumoides suturalis
MACOL531-10	AAP7925	Coleoptera	Coccinellidae	Coccinellinae	Brumoides	Brumoides suturalis
MACOL788-10	AAP7925	Coleoptera	Coccinellidae	Coccinellinae	Brumoides	Brumoides suturalis
MACOL790-10	AAP7925	Coleoptera	Coccinellidae	Coccinellinae	Brumoides	Brumoides suturalis
MACOL833-10	AAP7925	Coleoptera	Coccinellidae	Coccinellinae	Brumoides	Brumoides suturalis
MACOL849-10	AAP7925	Coleoptera	Coccinellidae	Coccinellinae	Brumoides	Brumoides suturalis
MACOL850-10	AAP7925	Coleoptera	Coccinellidae	Coccinellinae	Brumoides	Brumoides suturalis
MAIMB095-09	AAP7925	Coleoptera	Coccinellidae	Coccinellinae	Brumoides	Brumoides suturalis
MAIMB096-09	AAP7925	Coleoptera	Coccinellidae	Coccinellinae	Brumoides	Brumoides suturalis
MAIMB097-09	AAP7925	Coleoptera	Coccinellidae	Coccinellinae	Brumoides	Brumoides suturalis
MAIMB098-09	AAP7925	Coleoptera	Coccinellidae	Coccinellinae	Brumoides	Brumoides suturalis
MAMTL010-12	AAP7925	Coleoptera	Coccinellidae	Coccinellinae	Brumoides	Brumoides suturalis
MAMTL451-12	AAP7925	Coleoptera	Coccinellidae	Coccinellinae	Brumoides	Brumoides suturalis
MAMTM142-13	AAP7925	Coleoptera	Coccinellidae	Coccinellinae	Brumoides	Brumoides suturalis
MAMTM143-13	AAP7925	Coleoptera	Coccinellidae	Coccinellinae	Brumoides	Brumoides suturalis
MAMTM144-13	AAP7925	Coleoptera	Coccinellidae	Coccinellinae	Brumoides	Brumoides suturalis
MAMTN429-13	AAP7925	Coleoptera	Coccinellidae	Coccinellinae	Brumoides	Brumoides suturalis
MAMTN431-13	AAP7925	Coleoptera	Coccinellidae	Coccinellinae	Brumoides	Brumoides suturalis
MAMTN433-13	AAP7925	Coleoptera	Coccinellidae	Coccinellinae	Brumoides	Brumoides suturalis
MAMTN440-13	AAP7925	Coleoptera	Coccinellidae	Coccinellinae	Brumoides	Brumoides suturalis
MAMTN448-13	AAP7925	Coleoptera	Coccinellidae	Coccinellinae	Brumoides	Brumoides suturalis
MAMTO279-13	AAP7925	Coleoptera	Coccinellidae	Coccinellinae	Brumoides	Brumoides suturalis
MAMTO283-13	AAP7925	Coleoptera	Coccinellidae	Coccinellinae	Brumoides	Brumoides suturalis
MAMTP1694-13	AAP7925	Coleoptera	Coccinellidae	Coccinellinae	Brumoides	Brumoides suturalis
PMNHA335-14	AAP7925	Coleoptera	Coccinellidae	Coccinellinae	Brumoides	Brumoides suturalis
PMNHB067-14	AAP7925	Coleoptera	Coccinellidae	Coccinellinae	Brumoides	Brumoides suturalis
PMNHD945-15	AAP7925	Coleoptera	Coccinellidae	Coccinellinae	Brumoides	Brumoides suturalis
PMNHD957-15	AAP7925	Coleoptera	Coccinellidae	Coccinellinae	Brumoides	Brumoides suturalis
PMNHE482-15	AAP7925	Coleoptera	Coccinellidae	Coccinellinae	Brumoides	Brumoides suturalis
PMNHF320-15	AAP7925	Coleoptera	Coccinellidae	Coccinellinae	Brumoides	Brumoides suturalis
PMNHJ091-15	AAP7925	Coleoptera	Coccinellidae	Coccinellinae	Brumoides	Brumoides suturalis
MACOL1753-12		Coleoptera	Coccinellidae	Coccinellinae	Brumoides	Brumoides suturalis
MACOL3026-13	AAP8218	Coleoptera	Coccinellidae	Coccinellinae	Calvia	Calvia punctata
MACOL535-10	AAP8218	Coleoptera	Coccinellidae	Coccinellinae	Calvia	Calvia punctata
MACOL1332-11	ACM3340	Coleoptera	Coccinellidae	Coccinellinae	Cheilomenes	Cheilomenes sexmaculata
MACOL1333-11	ACM3340	Coleoptera	Coccinellidae	Coccinellinae	Cheilomenes	Cheilomenes sexmaculata
MACOL1334-11	ACM3340	Coleoptera	Coccinellidae	Coccinellinae	Cheilomenes	Cheilomenes sexmaculata
MACOL1335-11	ACM3340	Coleoptera	Coccinellidae	Coccinellinae	Cheilomenes	Cheilomenes sexmaculata
MACOL1843-12	ACM3340	Coleoptera	Coccinellidae	Coccinellinae	Cheilomenes	Cheilomenes sexmaculata
MACOL1845-12	ACM3340	Coleoptera	Coccinellidae	Coccinellinae	Cheilomenes	Cheilomenes sexmaculata
MACOL1847-12	ACM3340	Coleoptera	Coccinellidae	Coccinellinae	Cheilomenes	Cheilomenes sexmaculata
MACOL2930-13	ACM3340	Coleoptera	Coccinellidae	Coccinellinae	Cheilomenes	Cheilomenes sexmaculata
MACOL557-10	ACM3340	Coleoptera	Coccinellidae	Coccinellinae	Cheilomenes	Cheilomenes sexmaculata
MACOL561-10	ACM3340	Coleoptera	Coccinellidae	Coccinellinae	Cheilomenes	Cheilomenes sexmaculata
MACOL758-10	ACM3340	Coleoptera	Coccinellidae	Coccinellinae	Cheilomenes	Cheilomenes sexmaculata
MACOL760-10	ACM3340	Coleoptera	Coccinellidae	Coccinellinae	Cheilomenes	Cheilomenes sexmaculata
MACOL793-10	ACM3340	Coleoptera	Coccinellidae	Coccinellinae	Cheilomenes	Cheilomenes sexmaculata
MACOL799-10	ACM3340	Coleoptera	Coccinellidae	Coccinellinae	Cheilomenes	Cheilomenes sexmaculata
MACOL822-10	ACM3340	Coleoptera	Coccinellidae	Coccinellinae	Cheilomenes	Cheilomenes sexmaculata
MACOL851-10	ACM3340	Coleoptera	Coccinellidae	Coccinellinae	Cheilomenes	Cheilomenes sexmaculata
MACOL852-10	ACM3340	Coleoptera	Coccinellidae	Coccinellinae	Cheilomenes	Cheilomenes sexmaculata
MACOL853-10	ACM3340	Coleoptera	Coccinellidae	Coccinellinae	Cheilomenes	Cheilomenes sexmaculata
MACOL854-10	ACM3340	Coleoptera	Coccinellidae	Coccinellinae	Cheilomenes	Cheilomenes sexmaculata
MACOL865-10	ACM3340	Coleoptera	Coccinellidae	Coccinellinae	Cheilomenes	Cheilomenes sexmaculata
MACOL868-10	ACM3340	Coleoptera	Coccinellidae	Coccinellinae	Cheilomenes	Cheilomenes sexmaculata
MACOL869-10	ACM3340	Coleoptera	Coccinellidae	Coccinellinae	Cheilomenes	Cheilomenes sexmaculata
MAMTJ866-12	ACM3340	Coleoptera	Coccinellidae	Coccinellinae	Cheilomenes	Cheilomenes sexmaculata
MAMTP1855-13	ACM3340	Coleoptera	Coccinellidae	Coccinellinae	Cheilomenes	Cheilomenes sexmaculata
MAMTW441-14	ACM3340	Coleoptera	Coccinellidae	Coccinellinae	Cheilomenes	Cheilomenes sexmaculata
MAMTW442-14	ACM3340	Coleoptera	Coccinellidae	Coccinellinae	Cheilomenes	Cheilomenes sexmaculata
MTINS118-19	ACM3340	Coleoptera	Coccinellidae	Coccinellinae	Cheilomenes	Cheilomenes sexmaculata
PMNHD965-15	ACM3340	Coleoptera	Coccinellidae	Coccinellinae	Cheilomenes	Cheilomenes sexmaculata
PMNHJ087-15	ACM3340	Coleoptera	Coccinellidae	Coccinellinae	Cheilomenes	Cheilomenes sexmaculata
PMNHN422-15	ACM3340	Coleoptera	Coccinellidae	Coccinellinae	Cheilomenes	Cheilomenes sexmaculata
MACOL1307-11	ABU7222	Coleoptera	Coccinellidae	Coccinellinae	Chilocorus	Chilocorus infernalis
MACOL1304-11		Coleoptera	Coccinellidae	Coccinellinae	Chilocorus	Chilocorus infernalis
MAMTF1047-12	ABX2096	Coleoptera	Coccinellidae	Coccinellinae	Chilocorus	Chilocorus nigritus
MAMTI1424-12	ABX2096	Coleoptera	Coccinellidae	Coccinellinae	Chilocorus	Chilocorus nigritus
MAMTI1425-12	ABX2096	Coleoptera	Coccinellidae	Coccinellinae	Chilocorus	Chilocorus nigritus
MAMTJ868-12	ABX2096	Coleoptera	Coccinellidae	Coccinellinae	Chilocorus	Chilocorus nigritus
MAMTP1858-13	ABX2096	Coleoptera	Coccinellidae	Coccinellinae	Chilocorus	Chilocorus nigritus
MTINS096-19	ABX2096	Coleoptera	Coccinellidae	Coccinellinae	Chilocorus	Chilocorus nigritus
MACOL1309-11		Coleoptera	Coccinellidae	Coccinellinae	Chilocorus	Chilocorus rubidus
GMPBD282-18	AAA8933	Coleoptera	Coccinellidae	Coccinellinae	Coccinella	Coccinella septempunctata
GMPBG329-18	AAA8933	Coleoptera	Coccinellidae	Coccinellinae	Coccinella	Coccinella septempunctata
GMPBI462-18	AAA8933	Coleoptera	Coccinellidae	Coccinellinae	Coccinella	Coccinella septempunctata
GMPBL803-18	AAA8933	Coleoptera	Coccinellidae	Coccinellinae	Coccinella	Coccinella septempunctata
GMPBL806-18	AAA8933	Coleoptera	Coccinellidae	Coccinellinae	Coccinella	Coccinella septempunctata
GMPBL810-18	AAA8933	Coleoptera	Coccinellidae	Coccinellinae	Coccinella	Coccinella septempunctata
GMPBL811-18	AAA8933	Coleoptera	Coccinellidae	Coccinellinae	Coccinella	Coccinella septempunctata
GMPBL812-18	AAA8933	Coleoptera	Coccinellidae	Coccinellinae	Coccinella	Coccinella septempunctata
GMPBL815-18	AAA8933	Coleoptera	Coccinellidae	Coccinellinae	Coccinella	Coccinella septempunctata
GMPBL816-18	AAA8933	Coleoptera	Coccinellidae	Coccinellinae	Coccinella	Coccinella septempunctata
GMPBL819-18	AAA8933	Coleoptera	Coccinellidae	Coccinellinae	Coccinella	Coccinella septempunctata
GMPBL820-18	AAA8933	Coleoptera	Coccinellidae	Coccinellinae	Coccinella	Coccinella septempunctata
GMPBL824-18	AAA8933	Coleoptera	Coccinellidae	Coccinellinae	Coccinella	Coccinella septempunctata
GMPBL827-18	AAA8933	Coleoptera	Coccinellidae	Coccinellinae	Coccinella	Coccinella septempunctata
GMPBM123-18	AAA8933	Coleoptera	Coccinellidae	Coccinellinae	Coccinella	Coccinella septempunctata
MACOL1749-12	AAA8933	Coleoptera	Coccinellidae	Coccinellinae	Coccinella	Coccinella septempunctata
MACOL1750-12	AAA8933	Coleoptera	Coccinellidae	Coccinellinae	Coccinella	Coccinella septempunctata
MACOL2920-13	AAA8933	Coleoptera	Coccinellidae	Coccinellinae	Coccinella	Coccinella septempunctata
MACOL537-10	AAA8933	Coleoptera	Coccinellidae	Coccinellinae	Coccinella	Coccinella septempunctata
MACOL538-10	AAA8933	Coleoptera	Coccinellidae	Coccinellinae	Coccinella	Coccinella septempunctata
MACOL539-10	AAA8933	Coleoptera	Coccinellidae	Coccinellinae	Coccinella	Coccinella septempunctata
MACOL540-10	AAA8933	Coleoptera	Coccinellidae	Coccinellinae	Coccinella	Coccinella septempunctata
MACOL541-10	AAA8933	Coleoptera	Coccinellidae	Coccinellinae	Coccinella	Coccinella septempunctata
MACOL542-10	AAA8933	Coleoptera	Coccinellidae	Coccinellinae	Coccinella	Coccinella septempunctata
MACOL543-10	AAA8933	Coleoptera	Coccinellidae	Coccinellinae	Coccinella	Coccinella septempunctata
MACOL544-10	AAA8933	Coleoptera	Coccinellidae	Coccinellinae	Coccinella	Coccinella septempunctata
MACOL545-10	AAA8933	Coleoptera	Coccinellidae	Coccinellinae	Coccinella	Coccinella septempunctata
MACOL867-10	AAA8933	Coleoptera	Coccinellidae	Coccinellinae	Coccinella	Coccinella septempunctata
MAIMB072-09	AAA8933	Coleoptera	Coccinellidae	Coccinellinae	Coccinella	Coccinella septempunctata
MAIMB074-09	AAA8933	Coleoptera	Coccinellidae	Coccinellinae	Coccinella	Coccinella septempunctata
MAMTG882-12	AAA8933	Coleoptera	Coccinellidae	Coccinellinae	Coccinella	Coccinella septempunctata
MAMTG883-12	AAA8933	Coleoptera	Coccinellidae	Coccinellinae	Coccinella	Coccinella septempunctata
MAMTG884-12	AAA8933	Coleoptera	Coccinellidae	Coccinellinae	Coccinella	Coccinella septempunctata
MAMTH712-12	AAA8933	Coleoptera	Coccinellidae	Coccinellinae	Coccinella	Coccinella septempunctata
MAMTH713-12	AAA8933	Coleoptera	Coccinellidae	Coccinellinae	Coccinella	Coccinella septempunctata
MAMTH714-12	AAA8933	Coleoptera	Coccinellidae	Coccinellinae	Coccinella	Coccinella septempunctata
MAMTH715-12	AAA8933	Coleoptera	Coccinellidae	Coccinellinae	Coccinella	Coccinella septempunctata
MAMTI1414-12	AAA8933	Coleoptera	Coccinellidae	Coccinellinae	Coccinella	Coccinella septempunctata
MAMTI1415-12	AAA8933	Coleoptera	Coccinellidae	Coccinellinae	Coccinella	Coccinella septempunctata
MAMTI1416-12	AAA8933	Coleoptera	Coccinellidae	Coccinellinae	Coccinella	Coccinella septempunctata
MAMTI1417-12	AAA8933	Coleoptera	Coccinellidae	Coccinellinae	Coccinella	Coccinella septempunctata
MAMTI1418-12	AAA8933	Coleoptera	Coccinellidae	Coccinellinae	Coccinella	Coccinella septempunctata
MAMTI1419-12	AAA8933	Coleoptera	Coccinellidae	Coccinellinae	Coccinella	Coccinella septempunctata
MAMTI1420-12	AAA8933	Coleoptera	Coccinellidae	Coccinellinae	Coccinella	Coccinella septempunctata
MAMTI1421-12	AAA8933	Coleoptera	Coccinellidae	Coccinellinae	Coccinella	Coccinella septempunctata
MAMTJ862-12	AAA8933	Coleoptera	Coccinellidae	Coccinellinae	Coccinella	Coccinella septempunctata
MAMTJ867-12	AAA8933	Coleoptera	Coccinellidae	Coccinellinae	Coccinella	Coccinella septempunctata
MAMTK096-12	AAA8933	Coleoptera	Coccinellidae	Coccinellinae	Coccinella	Coccinella septempunctata
MAMTK097-12	AAA8933	Coleoptera	Coccinellidae	Coccinellinae	Coccinella	Coccinella septempunctata
MAMTK098-12	AAA8933	Coleoptera	Coccinellidae	Coccinellinae	Coccinella	Coccinella septempunctata
MAMTK099-12	AAA8933	Coleoptera	Coccinellidae	Coccinellinae	Coccinella	Coccinella septempunctata
MAMTL001-12	AAA8933	Coleoptera	Coccinellidae	Coccinellinae	Coccinella	Coccinella septempunctata
MAMTL002-12	AAA8933	Coleoptera	Coccinellidae	Coccinellinae	Coccinella	Coccinella septempunctata
MAMTL003-12	AAA8933	Coleoptera	Coccinellidae	Coccinellinae	Coccinella	Coccinella septempunctata
MAMTL005-12	AAA8933	Coleoptera	Coccinellidae	Coccinellinae	Coccinella	Coccinella septempunctata
MAMTL006-12	AAA8933	Coleoptera	Coccinellidae	Coccinellinae	Coccinella	Coccinella septempunctata
MAMTL007-12	AAA8933	Coleoptera	Coccinellidae	Coccinellinae	Coccinella	Coccinella septempunctata
MAMTM340-13	AAA8933	Coleoptera	Coccinellidae	Coccinellinae	Coccinella	Coccinella septempunctata
MAMTM341-13	AAA8933	Coleoptera	Coccinellidae	Coccinellinae	Coccinella	Coccinella septempunctata
MAMTM342-13	AAA8933	Coleoptera	Coccinellidae	Coccinellinae	Coccinella	Coccinella septempunctata
MAMTM344-13	AAA8933	Coleoptera	Coccinellidae	Coccinellinae	Coccinella	Coccinella septempunctata
MAMTN691-13	AAA8933	Coleoptera	Coccinellidae	Coccinellinae	Coccinella	Coccinella septempunctata
MAMTO298-13	AAA8933	Coleoptera	Coccinellidae	Coccinellinae	Coccinella	Coccinella septempunctata
MAMTO299-13	AAA8933	Coleoptera	Coccinellidae	Coccinellinae	Coccinella	Coccinella septempunctata
MAMTO300-13	AAA8933	Coleoptera	Coccinellidae	Coccinellinae	Coccinella	Coccinella septempunctata
MAMTP1811-13	AAA8933	Coleoptera	Coccinellidae	Coccinellinae	Coccinella	Coccinella septempunctata
MAMTP1812-13	AAA8933	Coleoptera	Coccinellidae	Coccinellinae	Coccinella	Coccinella septempunctata
MAMTQ023-14	AAA8933	Coleoptera	Coccinellidae	Coccinellinae	Coccinella	Coccinella septempunctata
MAMTQ026-14	AAA8933	Coleoptera	Coccinellidae	Coccinellinae	Coccinella	Coccinella septempunctata
MAMTW272-14	AAA8933	Coleoptera	Coccinellidae	Coccinellinae	Coccinella	Coccinella septempunctata
MTINS161-19	AAA8933	Coleoptera	Coccinellidae	Coccinellinae	Coccinella	Coccinella septempunctata
MTINS162-19	AAA8933	Coleoptera	Coccinellidae	Coccinellinae	Coccinella	Coccinella septempunctata
MTINS163-19	AAA8933	Coleoptera	Coccinellidae	Coccinellinae	Coccinella	Coccinella septempunctata
MTINS173-19	AAA8933	Coleoptera	Coccinellidae	Coccinellinae	Coccinella	Coccinella septempunctata
MTINS174-19	AAA8933	Coleoptera	Coccinellidae	Coccinellinae	Coccinella	Coccinella septempunctata
PMNHA711-15	AAA8933	Coleoptera	Coccinellidae	Coccinellinae	Coccinella	Coccinella septempunctata
PMNHD1387-15	AAA8933	Coleoptera	Coccinellidae	Coccinellinae	Coccinella	Coccinella septempunctata
PMNHD1388-15	AAA8933	Coleoptera	Coccinellidae	Coccinellinae	Coccinella	Coccinella septempunctata
PMNHJ168-15	AAA8933	Coleoptera	Coccinellidae	Coccinellinae	Coccinella	Coccinella septempunctata
PMNHN419-15	AAA8933	Coleoptera	Coccinellidae	Coccinellinae	Coccinella	Coccinella septempunctata
MACOL397-10	AAH3297	Coleoptera	Coccinellidae	Coccinellinae	Coccinella	Coccinella transversalis
MAMTG885-12	AAH3297	Coleoptera	Coccinellidae	Coccinellinae	Coccinella	Coccinella transversalis
MAMTO304-13	AAH3297	Coleoptera	Coccinellidae	Coccinellinae	Coccinella	Coccinella transversalis
PMNHD971-15	AAH3297	Coleoptera	Coccinellidae	Coccinellinae	Coccinella	Coccinella transversalis
PMNHC230-15		Coleoptera	Coccinellidae	Coccinellinae	Coccinella	Coccinella transversalis
GMPQI067-19	AAP7476	Coleoptera	Coccinellidae	Coccinellinae	Coccinella	Coccinella undecimpunctata
GMPQY063-19	AAP7476	Coleoptera	Coccinellidae	Coccinellinae	Coccinella	Coccinella undecimpunctata
MAMTM343-13	AAP7476	Coleoptera	Coccinellidae	Coccinellinae	Coccinella	Coccinella undecimpunctata
MACOL1636-12	AAP7965	Coleoptera	Coccinellidae	Coccinellinae	Coccinella
MACOL761-10	AAP7965	Coleoptera	Coccinellidae	Coccinellinae	Coccinella
MAMTO286-13	AAP7965	Coleoptera	Coccinellidae	Coccinellinae	Coccinella
MAMTP1699-13	AAP7965	Coleoptera	Coccinellidae	Coccinellinae	Coccinella
MAMTP1706-13	AAP7965	Coleoptera	Coccinellidae	Coccinellinae	Coccinella
MAMTP1720-13	AAP7965	Coleoptera	Coccinellidae	Coccinellinae	Coccinella
MAMTP1723-13	AAP7965	Coleoptera	Coccinellidae	Coccinellinae	Coccinella
MAMTQ255-14	AAP7965	Coleoptera	Coccinellidae	Coccinellinae	Coccinella
MAMTS218-14	AAP7965	Coleoptera	Coccinellidae	Coccinellinae	Coccinella
PMNHA314-14	AAP7965	Coleoptera	Coccinellidae	Coccinellinae	Coccinella
PMNHC148-15	AAP7965	Coleoptera	Coccinellidae	Coccinellinae	Coccinella
PMNHD948-15	AAP7965	Coleoptera	Coccinellidae	Coccinellinae	Coccinella
PMNHD950-15	AAP7965	Coleoptera	Coccinellidae	Coccinellinae	Coccinella
PMNHD952-15	AAP7965	Coleoptera	Coccinellidae	Coccinellinae	Coccinella
PMNHD962-15	AAP7965	Coleoptera	Coccinellidae	Coccinellinae	Coccinella
PMNHD984-15	AAP7965	Coleoptera	Coccinellidae	Coccinellinae	Coccinella
PMNHE480-15	AAP7965	Coleoptera	Coccinellidae	Coccinellinae	Coccinella
PMNHF323-15	AAP7965	Coleoptera	Coccinellidae	Coccinellinae	Coccinella
PMNHF332-15	AAP7965	Coleoptera	Coccinellidae	Coccinellinae	Coccinella
GMPQC764-19	AAU6400	Coleoptera	Coccinellidae	Coccinellinae	Coccinella
MAMTP1696-13	AAU6400	Coleoptera	Coccinellidae	Coccinellinae	Coccinella
MAMTR099-14	AAU6400	Coleoptera	Coccinellidae	Coccinellinae	Coccinella
PMNHE476-15	AAU6400	Coleoptera	Coccinellidae	Coccinellinae	Coccinella
MAMTP1685-13		Coleoptera	Coccinellidae	Coccinellinae	Coccinella
MAMTP1711-13		Coleoptera	Coccinellidae	Coccinellinae	Coccinella
PMNHG137-15		Coleoptera	Coccinellidae	Coccinellinae	Coccinella
MACOL1360-11	AAZ4382	Coleoptera	Coccinellidae	Coccinellinae	Epilachna	Epilachna deciplens
MACOL1361-11	AAZ4382	Coleoptera	Coccinellidae	Coccinellinae	Epilachna	Epilachna deciplens
MACOL1362-11	AAZ4382	Coleoptera	Coccinellidae	Coccinellinae	Epilachna	Epilachna deciplens
MACOL1363-11	AAZ4382	Coleoptera	Coccinellidae	Coccinellinae	Epilachna	Epilachna deciplens
MAIMB075-09		Coleoptera	Coccinellidae	Coccinellinae	Epilachna
MACOL2925-13	AAP8318	Coleoptera	Coccinellidae	Coccinellinae	Halyzia	Halyzia ischischerini
MACOL2926-13	AAP8318	Coleoptera	Coccinellidae	Coccinellinae	Halyzia	Halyzia ischischerini
MACOL405-10	AAP8318	Coleoptera	Coccinellidae	Coccinellinae	Halyzia	Halyzia ischischerini
MACOL521-10	AAP8318	Coleoptera	Coccinellidae	Coccinellinae	Halyzia	Halyzia ischischerini
MACOL520-10		Coleoptera	Coccinellidae	Coccinellinae	Halyzia	Halyzia ischischerini
MACOL523-10		Coleoptera	Coccinellidae	Coccinellinae	Halyzia	Halyzia ischischerini
MACOL2923-13	ADW3754	Coleoptera	Coccinellidae	Coccinellinae	Halyzia	Halyzia sancrita
MACOL2924-13	ADW3754	Coleoptera	Coccinellidae	Coccinellinae	Halyzia	Halyzia sancrita
MACOL2928-13	ADW3754	Coleoptera	Coccinellidae	Coccinellinae	Halyzia	Halyzia sancrita
MACOL1302-11		Coleoptera	Coccinellidae	Coccinellinae	Halyzia	Halyzia sancrita
MACOL1336-11	AAP7923	Coleoptera	Coccinellidae	Coccinellinae	Harmonia	Harmonia dimidiata
MACOL1337-11	AAP7923	Coleoptera	Coccinellidae	Coccinellinae	Harmonia	Harmonia dimidiata
MACOL1339-11	AAP7923	Coleoptera	Coccinellidae	Coccinellinae	Harmonia	Harmonia dimidiata
MACOL1537-11	AAP7923	Coleoptera	Coccinellidae	Coccinellinae	Harmonia	Harmonia dimidiata
MACOL2915-13	AAP7923	Coleoptera	Coccinellidae	Coccinellinae	Harmonia	Harmonia dimidiata
MACOL2919-13	AAP7923	Coleoptera	Coccinellidae	Coccinellinae	Harmonia	Harmonia dimidiata
MACOL518-10	AAP7923	Coleoptera	Coccinellidae	Coccinellinae	Harmonia	Harmonia dimidiata
MAMTW440-14	AAP7923	Coleoptera	Coccinellidae	Coccinellinae	Harmonia	Harmonia dimidiata
MACOL1338-11		Coleoptera	Coccinellidae	Coccinellinae	Harmonia	Harmonia dimidiata
MACOL1314-11	AAP7924	Coleoptera	Coccinellidae	Coccinellinae	Harmonia	Harmonia eucharis
MACOL1538-11	AAP7924	Coleoptera	Coccinellidae	Coccinellinae	Harmonia	Harmonia eucharis
MACOL1539-11	AAP7924	Coleoptera	Coccinellidae	Coccinellinae	Harmonia	Harmonia eucharis
MACOL2208-12	AAP7924	Coleoptera	Coccinellidae	Coccinellinae	Harmonia	Harmonia eucharis
MACOL2210-12	AAP7924	Coleoptera	Coccinellidae	Coccinellinae	Harmonia	Harmonia eucharis
MACOL2211-12	AAP7924	Coleoptera	Coccinellidae	Coccinellinae	Harmonia	Harmonia eucharis
MACOL2212-12	AAP7924	Coleoptera	Coccinellidae	Coccinellinae	Harmonia	Harmonia eucharis
MACOL2213-12	AAP7924	Coleoptera	Coccinellidae	Coccinellinae	Harmonia	Harmonia eucharis
MACOL2214-12	AAP7924	Coleoptera	Coccinellidae	Coccinellinae	Harmonia	Harmonia eucharis
MACOL2877-13	AAP7924	Coleoptera	Coccinellidae	Coccinellinae	Harmonia	Harmonia eucharis
MACOL2878-13	AAP7924	Coleoptera	Coccinellidae	Coccinellinae	Harmonia	Harmonia eucharis
MACOL2879-13	AAP7924	Coleoptera	Coccinellidae	Coccinellinae	Harmonia	Harmonia eucharis
MACOL2880-13	AAP7924	Coleoptera	Coccinellidae	Coccinellinae	Harmonia	Harmonia eucharis
MACOL2881-13	AAP7924	Coleoptera	Coccinellidae	Coccinellinae	Harmonia	Harmonia eucharis
MACOL2882-13	AAP7924	Coleoptera	Coccinellidae	Coccinellinae	Harmonia	Harmonia eucharis
MACOL2883-13	AAP7924	Coleoptera	Coccinellidae	Coccinellinae	Harmonia	Harmonia eucharis
MACOL2884-13	AAP7924	Coleoptera	Coccinellidae	Coccinellinae	Harmonia	Harmonia eucharis
MACOL2885-13	AAP7924	Coleoptera	Coccinellidae	Coccinellinae	Harmonia	Harmonia eucharis
MACOL2886-13	AAP7924	Coleoptera	Coccinellidae	Coccinellinae	Harmonia	Harmonia eucharis
MACOL2888-13	AAP7924	Coleoptera	Coccinellidae	Coccinellinae	Harmonia	Harmonia eucharis
MACOL2889-13	AAP7924	Coleoptera	Coccinellidae	Coccinellinae	Harmonia	Harmonia eucharis
MACOL2890-13	AAP7924	Coleoptera	Coccinellidae	Coccinellinae	Harmonia	Harmonia eucharis
MACOL2891-13	AAP7924	Coleoptera	Coccinellidae	Coccinellinae	Harmonia	Harmonia eucharis
MACOL2893-13	AAP7924	Coleoptera	Coccinellidae	Coccinellinae	Harmonia	Harmonia eucharis
MACOL2894-13	AAP7924	Coleoptera	Coccinellidae	Coccinellinae	Harmonia	Harmonia eucharis
MACOL2895-13	AAP7924	Coleoptera	Coccinellidae	Coccinellinae	Harmonia	Harmonia eucharis
MACOL2896-13	AAP7924	Coleoptera	Coccinellidae	Coccinellinae	Harmonia	Harmonia eucharis
MACOL2897-13	AAP7924	Coleoptera	Coccinellidae	Coccinellinae	Harmonia	Harmonia eucharis
MACOL2898-13	AAP7924	Coleoptera	Coccinellidae	Coccinellinae	Harmonia	Harmonia eucharis
MACOL2899-13	AAP7924	Coleoptera	Coccinellidae	Coccinellinae	Harmonia	Harmonia eucharis
MACOL2900-13	AAP7924	Coleoptera	Coccinellidae	Coccinellinae	Harmonia	Harmonia eucharis
MACOL2901-13	AAP7924	Coleoptera	Coccinellidae	Coccinellinae	Harmonia	Harmonia eucharis
MACOL2902-13	AAP7924	Coleoptera	Coccinellidae	Coccinellinae	Harmonia	Harmonia eucharis
MACOL2904-13	AAP7924	Coleoptera	Coccinellidae	Coccinellinae	Harmonia	Harmonia eucharis
MACOL2905-13	AAP7924	Coleoptera	Coccinellidae	Coccinellinae	Harmonia	Harmonia eucharis
MACOL2906-13	AAP7924	Coleoptera	Coccinellidae	Coccinellinae	Harmonia	Harmonia eucharis
MACOL2907-13	AAP7924	Coleoptera	Coccinellidae	Coccinellinae	Harmonia	Harmonia eucharis
MACOL2908-13	AAP7924	Coleoptera	Coccinellidae	Coccinellinae	Harmonia	Harmonia eucharis
MACOL2909-13	AAP7924	Coleoptera	Coccinellidae	Coccinellinae	Harmonia	Harmonia eucharis
MACOL2910-13	AAP7924	Coleoptera	Coccinellidae	Coccinellinae	Harmonia	Harmonia eucharis
MACOL2911-13	AAP7924	Coleoptera	Coccinellidae	Coccinellinae	Harmonia	Harmonia eucharis
MACOL2913-13	AAP7924	Coleoptera	Coccinellidae	Coccinellinae	Harmonia	Harmonia eucharis
MACOL2916-13	AAP7924	Coleoptera	Coccinellidae	Coccinellinae	Harmonia	Harmonia eucharis
MACOL2917-13	AAP7924	Coleoptera	Coccinellidae	Coccinellinae	Harmonia	Harmonia eucharis
MACOL2921-13	AAP7924	Coleoptera	Coccinellidae	Coccinellinae	Harmonia	Harmonia eucharis
MACOL519-10	AAP7924	Coleoptera	Coccinellidae	Coccinellinae	Harmonia	Harmonia eucharis
MACOL525-10	AAP7924	Coleoptera	Coccinellidae	Coccinellinae	Harmonia	Harmonia eucharis
MACOL526-10	AAP7924	Coleoptera	Coccinellidae	Coccinellinae	Harmonia	Harmonia eucharis
MACOL2215-12	AAP8602	Coleoptera	Coccinellidae	Coccinellinae	Harmonia
MACOL2216-12	AAP8602	Coleoptera	Coccinellidae	Coccinellinae	Harmonia
MACOL2217-12	AAP8602	Coleoptera	Coccinellidae	Coccinellinae	Harmonia
MACOL2218-12	AAP8602	Coleoptera	Coccinellidae	Coccinellinae	Harmonia
MACOL2219-12	AAP8602	Coleoptera	Coccinellidae	Coccinellinae	Harmonia
MACOL2220-12	AAP8602	Coleoptera	Coccinellidae	Coccinellinae	Harmonia
MACOL2221-12	AAP8602	Coleoptera	Coccinellidae	Coccinellinae	Harmonia
MACOL2222-12	AAP8602	Coleoptera	Coccinellidae	Coccinellinae	Harmonia
MACOL2223-12	AAP8602	Coleoptera	Coccinellidae	Coccinellinae	Harmonia
MACOL2224-12	AAP8602	Coleoptera	Coccinellidae	Coccinellinae	Harmonia
MACOL2225-12	AAP8602	Coleoptera	Coccinellidae	Coccinellinae	Harmonia
MACOL2226-12	AAP8602	Coleoptera	Coccinellidae	Coccinellinae	Harmonia
MACOL2227-12	AAP8602	Coleoptera	Coccinellidae	Coccinellinae	Harmonia
MACOL2228-12	AAP8602	Coleoptera	Coccinellidae	Coccinellinae	Harmonia
MACOL2229-12	AAP8602	Coleoptera	Coccinellidae	Coccinellinae	Harmonia
MACOL2230-12	AAP8602	Coleoptera	Coccinellidae	Coccinellinae	Harmonia
MACOL2912-13	AAP8602	Coleoptera	Coccinellidae	Coccinellinae	Harmonia
MACOL2914-13	AAP8602	Coleoptera	Coccinellidae	Coccinellinae	Harmonia
MACOL2918-13	AAP8602	Coleoptera	Coccinellidae	Coccinellinae	Harmonia
MACOL392-10	AAP8602	Coleoptera	Coccinellidae	Coccinellinae	Harmonia
MACOL755-10	AAP8602	Coleoptera	Coccinellidae	Coccinellinae	Harmonia
MACOL2887-13	ACI8680	Coleoptera	Coccinellidae	Coccinellinae	Harmonia
MACOL2903-13	ACI8680	Coleoptera	Coccinellidae	Coccinellinae	Harmonia
MACOL1345-11	AAP7927	Coleoptera	Coccinellidae	Coccinellinae	Henosepilachna	Henosepilachna elaterii
MACOL1346-11	AAP7927	Coleoptera	Coccinellidae	Coccinellinae	Henosepilachna	Henosepilachna elaterii
MACOL1347-11	AAP7927	Coleoptera	Coccinellidae	Coccinellinae	Henosepilachna	Henosepilachna elaterii
MACOL1348-11	AAP7927	Coleoptera	Coccinellidae	Coccinellinae	Henosepilachna	Henosepilachna elaterii
MACOL1349-11	AAP7927	Coleoptera	Coccinellidae	Coccinellinae	Henosepilachna	Henosepilachna elaterii
MACOL1747-12	AAP7927	Coleoptera	Coccinellidae	Coccinellinae	Henosepilachna	Henosepilachna elaterii
MACOL547-10	AAP7927	Coleoptera	Coccinellidae	Coccinellinae	Henosepilachna	Henosepilachna elaterii
MACOL1355-11	AAX1734	Coleoptera	Coccinellidae	Coccinellinae	Henosepilachna	Henosepilachna septima
MACOL1356-11	AAX1734	Coleoptera	Coccinellidae	Coccinellinae	Henosepilachna	Henosepilachna septima
MACOL1357-11	AAX1734	Coleoptera	Coccinellidae	Coccinellinae	Henosepilachna	Henosepilachna septima
MACOL1358-11	AAZ4383	Coleoptera	Coccinellidae	Coccinellinae	Henosepilachna	Henosepilachna septima
MACOL1365-11	AAZ4383	Coleoptera	Coccinellidae	Coccinellinae	Henosepilachna	Henosepilachna septima
MACOL1366-11	AAZ4383	Coleoptera	Coccinellidae	Coccinellinae	Henosepilachna	Henosepilachna septima
MACOL1367-11	AAZ4383	Coleoptera	Coccinellidae	Coccinellinae	Henosepilachna	Henosepilachna septima
MACOL1368-11		Coleoptera	Coccinellidae	Coccinellinae	Henosepilachna	Henosepilachna septima
MACOL2922-13	AAI6802	Coleoptera	Coccinellidae	Coccinellinae	Henosepilachna	Henosepilachna vigintioctopunctata
MACOL549-10	AAI6802	Coleoptera	Coccinellidae	Coccinellinae	Henosepilachna	Henosepilachna vigintioctopunctata
MACOL550-10	AAI6802	Coleoptera	Coccinellidae	Coccinellinae	Henosepilachna	Henosepilachna vigintioctopunctata
MACOL1342-11		Coleoptera	Coccinellidae	Coccinellinae	Henosepilachna	Henosepilachna vigintioctopunctata
MACOL1343-11		Coleoptera	Coccinellidae	Coccinellinae	Henosepilachna	Henosepilachna vigintioctopunctata
MACOL546-10		Coleoptera	Coccinellidae	Coccinellinae	Henosepilachna	Henosepilachna vigintioctopunctata
MACOL548-10		Coleoptera	Coccinellidae	Coccinellinae	Henosepilachna	Henosepilachna vigintioctopunctata
MACOL551-10		Coleoptera	Coccinellidae	Coccinellinae	Henosepilachna	Henosepilachna vigintioctopunctata
GMPBK1477-18	AAH3299	Coleoptera	Coccinellidae	Coccinellinae	Hippodamia	Hippodamia variegata
GMPBK1578-18	AAH3299	Coleoptera	Coccinellidae	Coccinellinae	Hippodamia	Hippodamia variegata
GMPBK183-18	AAH3299	Coleoptera	Coccinellidae	Coccinellinae	Hippodamia	Hippodamia variegata
GMPBK2487-18	AAH3299	Coleoptera	Coccinellidae	Coccinellinae	Hippodamia	Hippodamia variegata
GMPBK2527-18	AAH3299	Coleoptera	Coccinellidae	Coccinellinae	Hippodamia	Hippodamia variegata
GMPBK2622-18	AAH3299	Coleoptera	Coccinellidae	Coccinellinae	Hippodamia	Hippodamia variegata
GMPBK2721-18	AAH3299	Coleoptera	Coccinellidae	Coccinellinae	Hippodamia	Hippodamia variegata
GMPBK2737-18	AAH3299	Coleoptera	Coccinellidae	Coccinellinae	Hippodamia	Hippodamia variegata
GMPBK2804-18	AAH3299	Coleoptera	Coccinellidae	Coccinellinae	Hippodamia	Hippodamia variegata
GMPBK3228-18	AAH3299	Coleoptera	Coccinellidae	Coccinellinae	Hippodamia	Hippodamia variegata
GMPBK3457-18	AAH3299	Coleoptera	Coccinellidae	Coccinellinae	Hippodamia	Hippodamia variegata
GMPBL106-18	AAH3299	Coleoptera	Coccinellidae	Coccinellinae	Hippodamia	Hippodamia variegata
GMPBL116-18	AAH3299	Coleoptera	Coccinellidae	Coccinellinae	Hippodamia	Hippodamia variegata
GMPBL120-18	AAH3299	Coleoptera	Coccinellidae	Coccinellinae	Hippodamia	Hippodamia variegata
GMPBL131-18	AAH3299	Coleoptera	Coccinellidae	Coccinellinae	Hippodamia	Hippodamia variegata
GMPBL133-18	AAH3299	Coleoptera	Coccinellidae	Coccinellinae	Hippodamia	Hippodamia variegata
GMPBL172-18	AAH3299	Coleoptera	Coccinellidae	Coccinellinae	Hippodamia	Hippodamia variegata
GMPBL182-18	AAH3299	Coleoptera	Coccinellidae	Coccinellinae	Hippodamia	Hippodamia variegata
GMPBL183-18	AAH3299	Coleoptera	Coccinellidae	Coccinellinae	Hippodamia	Hippodamia variegata
GMPBL297-18	AAH3299	Coleoptera	Coccinellidae	Coccinellinae	Hippodamia	Hippodamia variegata
GMPBL299-18	AAH3299	Coleoptera	Coccinellidae	Coccinellinae	Hippodamia	Hippodamia variegata
GMPBL319-18	AAH3299	Coleoptera	Coccinellidae	Coccinellinae	Hippodamia	Hippodamia variegata
GMPBL327-18	AAH3299	Coleoptera	Coccinellidae	Coccinellinae	Hippodamia	Hippodamia variegata
GMPBL340-18	AAH3299	Coleoptera	Coccinellidae	Coccinellinae	Hippodamia	Hippodamia variegata
GMPBL397-18	AAH3299	Coleoptera	Coccinellidae	Coccinellinae	Hippodamia	Hippodamia variegata
GMPBL460-18	AAH3299	Coleoptera	Coccinellidae	Coccinellinae	Hippodamia	Hippodamia variegata
GMPBL509-18	AAH3299	Coleoptera	Coccinellidae	Coccinellinae	Hippodamia	Hippodamia variegata
GMPBL552-18	AAH3299	Coleoptera	Coccinellidae	Coccinellinae	Hippodamia	Hippodamia variegata
GMPBL565-18	AAH3299	Coleoptera	Coccinellidae	Coccinellinae	Hippodamia	Hippodamia variegata
GMPBL576-18	AAH3299	Coleoptera	Coccinellidae	Coccinellinae	Hippodamia	Hippodamia variegata
GMPBL578-18	AAH3299	Coleoptera	Coccinellidae	Coccinellinae	Hippodamia	Hippodamia variegata
GMPBL603-18	AAH3299	Coleoptera	Coccinellidae	Coccinellinae	Hippodamia	Hippodamia variegata
GMPBM198-18	AAH3299	Coleoptera	Coccinellidae	Coccinellinae	Hippodamia	Hippodamia variegata
GMPQA598-19	AAH3299	Coleoptera	Coccinellidae	Coccinellinae	Hippodamia	Hippodamia variegata
GMPQA601-19	AAH3299	Coleoptera	Coccinellidae	Coccinellinae	Hippodamia	Hippodamia variegata
GMPQE871-19	AAH3299	Coleoptera	Coccinellidae	Coccinellinae	Hippodamia	Hippodamia variegata
GMPQI068-19	AAH3299	Coleoptera	Coccinellidae	Coccinellinae	Hippodamia	Hippodamia variegata
GMPQY062-19	AAH3299	Coleoptera	Coccinellidae	Coccinellinae	Hippodamia	Hippodamia variegata
MACOL1752-12	AAH3299	Coleoptera	Coccinellidae	Coccinellinae	Hippodamia	Hippodamia variegata
MACOL414-10	AAH3299	Coleoptera	Coccinellidae	Coccinellinae	Hippodamia	Hippodamia variegata
MACOL415-10	AAH3299	Coleoptera	Coccinellidae	Coccinellinae	Hippodamia	Hippodamia variegata
MACOL416-10	AAH3299	Coleoptera	Coccinellidae	Coccinellinae	Hippodamia	Hippodamia variegata
MACOL417-10	AAH3299	Coleoptera	Coccinellidae	Coccinellinae	Hippodamia	Hippodamia variegata
MACOL418-10	AAH3299	Coleoptera	Coccinellidae	Coccinellinae	Hippodamia	Hippodamia variegata
MACOL419-10	AAH3299	Coleoptera	Coccinellidae	Coccinellinae	Hippodamia	Hippodamia variegata
MACOL796-10	AAH3299	Coleoptera	Coccinellidae	Coccinellinae	Hippodamia	Hippodamia variegata
MACOL862-10	AAH3299	Coleoptera	Coccinellidae	Coccinellinae	Hippodamia	Hippodamia variegata
MACOL864-10	AAH3299	Coleoptera	Coccinellidae	Coccinellinae	Hippodamia	Hippodamia variegata
MAMTK101-12	AAH3299	Coleoptera	Coccinellidae	Coccinellinae	Hippodamia	Hippodamia variegata
MAMTO301-13	AAH3299	Coleoptera	Coccinellidae	Coccinellinae	Hippodamia	Hippodamia variegata
MAMTO302-13	AAH3299	Coleoptera	Coccinellidae	Coccinellinae	Hippodamia	Hippodamia variegata
PMNHB065-14	AAH3299	Coleoptera	Coccinellidae	Coccinellinae	Hippodamia	Hippodamia variegata
PMNHD1263-15	AAH3299	Coleoptera	Coccinellidae	Coccinellinae	Hippodamia	Hippodamia variegata
PMNHD973-15	AAH3299	Coleoptera	Coccinellidae	Coccinellinae	Hippodamia	Hippodamia variegata
MACOL1270-11		Coleoptera	Coccinellidae	Coccinellinae	Hippodamia	Hippodamia variegata
MACOL1272-11		Coleoptera	Coccinellidae	Coccinellinae	Hippodamia	Hippodamia variegata
MACOL1748-12		Coleoptera	Coccinellidae	Coccinellinae	Hippodamia	Hippodamia variegata
MACOL420-10		Coleoptera	Coccinellidae	Coccinellinae	Hippodamia	Hippodamia variegata
MAMTR127-14	ACP7643	Coleoptera	Coccinellidae	Coccinellinae	Hyperaspis
PMNHD980-15	ACP7643	Coleoptera	Coccinellidae	Coccinellinae	Hyperaspis
PMNHI128-15	ACP7643	Coleoptera	Coccinellidae	Coccinellinae	Hyperaspis
MACOL1283-11		Coleoptera	Coccinellidae	Coccinellinae	Oenopia	Oenopia oncina
MACOL1295-11	AAP8601	Coleoptera	Coccinellidae	Coccinellinae	Oenopia	Oenopia sauzeti
MACOL1297-11	AAP8601	Coleoptera	Coccinellidae	Coccinellinae	Oenopia	Oenopia sauzeti
MACOL1298-11	AAP8601	Coleoptera	Coccinellidae	Coccinellinae	Oenopia	Oenopia sauzeti
MACOL1327-11	AAP8601	Coleoptera	Coccinellidae	Coccinellinae	Oenopia	Oenopia sauzeti
MACOL391-10	AAP8601	Coleoptera	Coccinellidae	Coccinellinae	Oenopia	Oenopia sauzeti
MAMTD513-12	AAP8601	Coleoptera	Coccinellidae	Coccinellinae	Oenopia	Oenopia sauzeti
MAMTD514-12	AAP8601	Coleoptera	Coccinellidae	Coccinellinae	Oenopia	Oenopia sauzeti
MAMTD516-12	AAP8601	Coleoptera	Coccinellidae	Coccinellinae	Oenopia	Oenopia sauzeti
MAMTD517-12	AAP8601	Coleoptera	Coccinellidae	Coccinellinae	Oenopia	Oenopia sauzeti
MAMTD521-12	AAP8601	Coleoptera	Coccinellidae	Coccinellinae	Oenopia	Oenopia sauzeti
MAMTD523-12	AAP8601	Coleoptera	Coccinellidae	Coccinellinae	Oenopia	Oenopia sauzeti
MAMTG045-12	AAP8601	Coleoptera	Coccinellidae	Coccinellinae	Oenopia	Oenopia sauzeti
MAMTG053-12	AAP8601	Coleoptera	Coccinellidae	Coccinellinae	Oenopia	Oenopia sauzeti
MAMTG056-12	AAP8601	Coleoptera	Coccinellidae	Coccinellinae	Oenopia	Oenopia sauzeti
MAMTG057-12	AAP8601	Coleoptera	Coccinellidae	Coccinellinae	Oenopia	Oenopia sauzeti
MAMTG058-12	AAP8601	Coleoptera	Coccinellidae	Coccinellinae	Oenopia	Oenopia sauzeti
MAMTG060-12	AAP8601	Coleoptera	Coccinellidae	Coccinellinae	Oenopia	Oenopia sauzeti
MAMTG886-12	AAP8601	Coleoptera	Coccinellidae	Coccinellinae	Oenopia	Oenopia sauzeti
MAMTH716-12	AAP8601	Coleoptera	Coccinellidae	Coccinellinae	Oenopia	Oenopia sauzeti
MAMTK561-12	AAP8601	Coleoptera	Coccinellidae	Coccinellinae	Oenopia	Oenopia sauzeti
MAMTL008-12	AAP8601	Coleoptera	Coccinellidae	Coccinellinae	Oenopia	Oenopia sauzeti
MAMTL009-12	AAP8601	Coleoptera	Coccinellidae	Coccinellinae	Oenopia	Oenopia sauzeti
MACOL390-10		Coleoptera	Coccinellidae	Coccinellinae	Oenopia	Oenopia sauzeti
MAMTF1034-12		Coleoptera	Coccinellidae	Coccinellinae	Oenopia	Oenopia sauzeti
GMPQA599-19	ADZ9875	Coleoptera	Coccinellidae	Coccinellinae	Oenopia
MACOL768-10	AAF6935	Coleoptera	Coccinellidae	Coccinellinae	Propylea	Propylea quatuordecimpunctata
MACOL778-10	AAF6935	Coleoptera	Coccinellidae	Coccinellinae	Propylea	Propylea quatuordecimpunctata
MACOL807-10	AAF6935	Coleoptera	Coccinellidae	Coccinellinae	Propylea	Propylea quatuordecimpunctata
MAMTK100-12	AAF6935	Coleoptera	Coccinellidae	Coccinellinae	Propylea	Propylea quatuordecimpunctata
MAMTP1853-13	AAF6935	Coleoptera	Coccinellidae	Coccinellinae	Propylea	Propylea quatuordecimpunctata
MACOL859-10	AEA6298	Coleoptera	Coccinellidae	Coccinellinae	Propylea	Propylea quatuordecimpunctata
MACOL866-10		Coleoptera	Coccinellidae	Coccinellinae	Propylea	Propylea quatuordecimpunctata
GMPBC062-18	AAH3306	Coleoptera	Coccinellidae	Coccinellinae	Scymnus	Scymnus mitior
GMPBL108-18	AAP7968	Coleoptera	Coccinellidae	Coccinellinae	Scymnus	Scymnus nubilus
GMPQC755-19	AAP7968	Coleoptera	Coccinellidae	Coccinellinae	Scymnus	Scymnus nubilus
GMPQE1333-19	AAP7968	Coleoptera	Coccinellidae	Coccinellinae	Scymnus	Scymnus nubilus
GMPQI112-19	AAP7968	Coleoptera	Coccinellidae	Coccinellinae	Scymnus	Scymnus nubilus
GMPQI118-19	AAP7968	Coleoptera	Coccinellidae	Coccinellinae	Scymnus	Scymnus nubilus
MACOL1371-11	AAP7968	Coleoptera	Coccinellidae	Coccinellinae	Scymnus	Scymnus nubilus
MACOL1372-11	AAP7968	Coleoptera	Coccinellidae	Coccinellinae	Scymnus	Scymnus nubilus
MACOL1373-11	AAP7968	Coleoptera	Coccinellidae	Coccinellinae	Scymnus	Scymnus nubilus
MACOL1374-11	AAP7968	Coleoptera	Coccinellidae	Coccinellinae	Scymnus	Scymnus nubilus
MACOL1640-12	AAP7968	Coleoptera	Coccinellidae	Coccinellinae	Scymnus	Scymnus nubilus
MACOL772-10	AAP7968	Coleoptera	Coccinellidae	Coccinellinae	Scymnus	Scymnus nubilus
MACOL784-10	AAP7968	Coleoptera	Coccinellidae	Coccinellinae	Scymnus	Scymnus nubilus
MAMTF1412-12	AAP7968	Coleoptera	Coccinellidae	Coccinellinae	Scymnus	Scymnus nubilus
MAMTH720-12	AAP7968	Coleoptera	Coccinellidae	Coccinellinae	Scymnus	Scymnus nubilus
MAMTH727-12	AAP7968	Coleoptera	Coccinellidae	Coccinellinae	Scymnus	Scymnus nubilus
MAMTH728-12	AAP7968	Coleoptera	Coccinellidae	Coccinellinae	Scymnus	Scymnus nubilus
MAMTI1434-12	AAP7968	Coleoptera	Coccinellidae	Coccinellinae	Scymnus	Scymnus nubilus
MAMTI1449-12	AAP7968	Coleoptera	Coccinellidae	Coccinellinae	Scymnus	Scymnus nubilus
MAMTI1450-12	AAP7968	Coleoptera	Coccinellidae	Coccinellinae	Scymnus	Scymnus nubilus
MAMTI1467-12	AAP7968	Coleoptera	Coccinellidae	Coccinellinae	Scymnus	Scymnus nubilus
MAMTJ883-12	AAP7968	Coleoptera	Coccinellidae	Coccinellinae	Scymnus	Scymnus nubilus
MAMTJ887-12	AAP7968	Coleoptera	Coccinellidae	Coccinellinae	Scymnus	Scymnus nubilus
MAMTK553-12	AAP7968	Coleoptera	Coccinellidae	Coccinellinae	Scymnus	Scymnus nubilus
MAMTL478-12	AAP7968	Coleoptera	Coccinellidae	Coccinellinae	Scymnus	Scymnus nubilus
MAMTL490-12	AAP7968	Coleoptera	Coccinellidae	Coccinellinae	Scymnus	Scymnus nubilus
MAMTM125-13	AAP7968	Coleoptera	Coccinellidae	Coccinellinae	Scymnus	Scymnus nubilus
MAMTM134-13	AAP7968	Coleoptera	Coccinellidae	Coccinellinae	Scymnus	Scymnus nubilus
MAMTN427-13	AAP7968	Coleoptera	Coccinellidae	Coccinellinae	Scymnus	Scymnus nubilus
MAMTN441-13	AAP7968	Coleoptera	Coccinellidae	Coccinellinae	Scymnus	Scymnus nubilus
MAMTN452-13	AAP7968	Coleoptera	Coccinellidae	Coccinellinae	Scymnus	Scymnus nubilus
MAMTN454-13	AAP7968	Coleoptera	Coccinellidae	Coccinellinae	Scymnus	Scymnus nubilus
MAMTO280-13	AAP7968	Coleoptera	Coccinellidae	Coccinellinae	Scymnus	Scymnus nubilus
MAMTP1885-13	AAP7968	Coleoptera	Coccinellidae	Coccinellinae	Scymnus	Scymnus nubilus
MAMTS229-14	AAP7968	Coleoptera	Coccinellidae	Coccinellinae	Scymnus	Scymnus nubilus
MAMTV113-14	AAP7968	Coleoptera	Coccinellidae	Coccinellinae	Scymnus	Scymnus nubilus
MAMTW251-14	AAP7968	Coleoptera	Coccinellidae	Coccinellinae	Scymnus	Scymnus nubilus
MAMTY339-14	AAP7968	Coleoptera	Coccinellidae	Coccinellinae	Scymnus	Scymnus nubilus
PMNHA313-14	AAP7968	Coleoptera	Coccinellidae	Coccinellinae	Scymnus	Scymnus nubilus
PMNHA318-14	AAP7968	Coleoptera	Coccinellidae	Coccinellinae	Scymnus	Scymnus nubilus
PMNHA322-14	AAP7968	Coleoptera	Coccinellidae	Coccinellinae	Scymnus	Scymnus nubilus
PMNHA560-14	AAP7968	Coleoptera	Coccinellidae	Coccinellinae	Scymnus	Scymnus nubilus
PMNHA562-14	AAP7968	Coleoptera	Coccinellidae	Coccinellinae	Scymnus	Scymnus nubilus
PMNHC151-15	AAP7968	Coleoptera	Coccinellidae	Coccinellinae	Scymnus	Scymnus nubilus
PMNHD949-15	AAP7968	Coleoptera	Coccinellidae	Coccinellinae	Scymnus	Scymnus nubilus
PMNHD954-15	AAP7968	Coleoptera	Coccinellidae	Coccinellinae	Scymnus	Scymnus nubilus
PMNHD967-15	AAP7968	Coleoptera	Coccinellidae	Coccinellinae	Scymnus	Scymnus nubilus
PMNHD970-15	AAP7968	Coleoptera	Coccinellidae	Coccinellinae	Scymnus	Scymnus nubilus
PMNHD976-15	AAP7968	Coleoptera	Coccinellidae	Coccinellinae	Scymnus	Scymnus nubilus
PMNHE486-15	AAP7968	Coleoptera	Coccinellidae	Coccinellinae	Scymnus	Scymnus nubilus
MAMTG052-12		Coleoptera	Coccinellidae	Coccinellinae	Scymnus	Scymnus nubilus
MAMTM167-13		Coleoptera	Coccinellidae	Coccinellinae	Scymnus	Scymnus nubilus
MAMTW262-14		Coleoptera	Coccinellidae	Coccinellinae	Scymnus	Scymnus nubilus
PMNHC141-15		Coleoptera	Coccinellidae	Coccinellinae	Scymnus	Scymnus nubilus
PMNHC145-15		Coleoptera	Coccinellidae	Coccinellinae	Scymnus	Scymnus nubilus
GMPQE1324-19	ACM9755	Coleoptera	Coccinellidae	Coccinellinae	Scymnus	Scymnus subvillosus
GMPQI097-19	ACM9755	Coleoptera	Coccinellidae	Coccinellinae	Scymnus	Scymnus subvillosus
GMPQI102-19	ACM9755	Coleoptera	Coccinellidae	Coccinellinae	Scymnus	Scymnus subvillosus
GMPQC727-19	AEA2218	Coleoptera	Coccinellidae	Coccinellinae	Scymnus
GMPQC731-19	AEA2218	Coleoptera	Coccinellidae	Coccinellinae	Scymnus
GMPQC748-19	AEA2218	Coleoptera	Coccinellidae	Coccinellinae	Scymnus
GMPQE1306-19	AEA2218	Coleoptera	Coccinellidae	Coccinellinae	Scymnus
GMPQC754-19	ABZ8956	Coleoptera	Coccinellidae	Coccinellinae	Stethorus
GMPQC760-19	ABZ8956	Coleoptera	Coccinellidae	Coccinellinae	Stethorus
GMPQE1310-19	ABZ8956	Coleoptera	Coccinellidae	Coccinellinae	Stethorus
GMPQE1313-19	ABZ8956	Coleoptera	Coccinellidae	Coccinellinae	Stethorus
GMPQE1318-19	ABZ8956	Coleoptera	Coccinellidae	Coccinellinae	Stethorus
GMPQE1330-19	ABZ8956	Coleoptera	Coccinellidae	Coccinellinae	Stethorus
GMPQE1345-19	ABZ8956	Coleoptera	Coccinellidae	Coccinellinae	Stethorus
GMPQI095-19	ABZ8956	Coleoptera	Coccinellidae	Coccinellinae	Stethorus
MAMTI1440-12	ABZ8956	Coleoptera	Coccinellidae	Coccinellinae	Stethorus
MAMTI1441-12	ABZ8956	Coleoptera	Coccinellidae	Coccinellinae	Stethorus
MAMTI1444-12	ABZ8956	Coleoptera	Coccinellidae	Coccinellinae	Stethorus
MAMTI1445-12	ABZ8956	Coleoptera	Coccinellidae	Coccinellinae	Stethorus
MAMTI1447-12	ABZ8956	Coleoptera	Coccinellidae	Coccinellinae	Stethorus
MAMTI1456-12	ABZ8956	Coleoptera	Coccinellidae	Coccinellinae	Stethorus
MAMTJ880-12	ABZ8956	Coleoptera	Coccinellidae	Coccinellinae	Stethorus
MAMTJ889-12	ABZ8956	Coleoptera	Coccinellidae	Coccinellinae	Stethorus
MAMTJ892-12	ABZ8956	Coleoptera	Coccinellidae	Coccinellinae	Stethorus
MAMTK233-12	ABZ8956	Coleoptera	Coccinellidae	Coccinellinae	Stethorus
MAMTK247-12	ABZ8956	Coleoptera	Coccinellidae	Coccinellinae	Stethorus
MAMTK248-12	ABZ8956	Coleoptera	Coccinellidae	Coccinellinae	Stethorus
MAMTK249-12	ABZ8956	Coleoptera	Coccinellidae	Coccinellinae	Stethorus
MAMTK250-12	ABZ8956	Coleoptera	Coccinellidae	Coccinellinae	Stethorus
MAMTK251-12	ABZ8956	Coleoptera	Coccinellidae	Coccinellinae	Stethorus
MAMTK257-12	ABZ8956	Coleoptera	Coccinellidae	Coccinellinae	Stethorus
MAMTK258-12	ABZ8956	Coleoptera	Coccinellidae	Coccinellinae	Stethorus
MAMTL453-12	ABZ8956	Coleoptera	Coccinellidae	Coccinellinae	Stethorus
MAMTL456-12	ABZ8956	Coleoptera	Coccinellidae	Coccinellinae	Stethorus
MAMTL475-12	ABZ8956	Coleoptera	Coccinellidae	Coccinellinae	Stethorus
MAMTL491-12	ABZ8956	Coleoptera	Coccinellidae	Coccinellinae	Stethorus
MAMTL494-12	ABZ8956	Coleoptera	Coccinellidae	Coccinellinae	Stethorus
MAMTL495-12	ABZ8956	Coleoptera	Coccinellidae	Coccinellinae	Stethorus
MAMTM136-13	ABZ8956	Coleoptera	Coccinellidae	Coccinellinae	Stethorus
MAMTM137-13	ABZ8956	Coleoptera	Coccinellidae	Coccinellinae	Stethorus
MAMTM138-13	ABZ8956	Coleoptera	Coccinellidae	Coccinellinae	Stethorus
MAMTM168-13	ABZ8956	Coleoptera	Coccinellidae	Coccinellinae	Stethorus
MAMTN453-13	ABZ8956	Coleoptera	Coccinellidae	Coccinellinae	Stethorus
MAMTN456-13	ABZ8956	Coleoptera	Coccinellidae	Coccinellinae	Stethorus
MAMTN457-13	ABZ8956	Coleoptera	Coccinellidae	Coccinellinae	Stethorus
MAMTN462-13	ABZ8956	Coleoptera	Coccinellidae	Coccinellinae	Stethorus
MAMTO332-13	ABZ8956	Coleoptera	Coccinellidae	Coccinellinae	Stethorus
PMNHA310-14	ABZ8956	Coleoptera	Coccinellidae	Coccinellinae	Stethorus
PMNHA312-14	ABZ8956	Coleoptera	Coccinellidae	Coccinellinae	Stethorus
PMNHA315-14	ABZ8956	Coleoptera	Coccinellidae	Coccinellinae	Stethorus
PMNHA316-14	ABZ8956	Coleoptera	Coccinellidae	Coccinellinae	Stethorus
PMNHA326-14	ABZ8956	Coleoptera	Coccinellidae	Coccinellinae	Stethorus
PMNHA327-14	ABZ8956	Coleoptera	Coccinellidae	Coccinellinae	Stethorus
PMNHA570-14	ABZ8956	Coleoptera	Coccinellidae	Coccinellinae	Stethorus
PMNHA571-14	ABZ8956	Coleoptera	Coccinellidae	Coccinellinae	Stethorus
PMNHA574-14	ABZ8956	Coleoptera	Coccinellidae	Coccinellinae	Stethorus
PMNHA576-14	ABZ8956	Coleoptera	Coccinellidae	Coccinellinae	Stethorus
PMNHA577-14	ABZ8956	Coleoptera	Coccinellidae	Coccinellinae	Stethorus
PMNHA578-14	ABZ8956	Coleoptera	Coccinellidae	Coccinellinae	Stethorus
PMNHB066-14	ABZ8956	Coleoptera	Coccinellidae	Coccinellinae	Stethorus
MACOL1846-12	AAP7926	Coleoptera	Coccinellidae
MACOL532-10	AAP7926	Coleoptera	Coccinellidae
MACOL1842-12	AAP7928	Coleoptera	Coccinellidae
MACOL1844-12	AAP7928	Coleoptera	Coccinellidae
MACOL552-10	AAP7928	Coleoptera	Coccinellidae
MACOL553-10	AAP7928	Coleoptera	Coccinellidae
MACOL554-10	AAP7928	Coleoptera	Coccinellidae
MACOL555-10	AAP7928	Coleoptera	Coccinellidae
MACOL556-10	AAP7928	Coleoptera	Coccinellidae
MACOL764-10	AAP7928	Coleoptera	Coccinellidae
MACOL842-10	AAP7928	Coleoptera	Coccinellidae
MACOL843-10	AAP7928	Coleoptera	Coccinellidae
MACOL844-10	AAP7928	Coleoptera	Coccinellidae
MACOL783-10	AAP7973	Coleoptera	Coccinellidae
MACOL803-10	AAP7980	Coleoptera	Coccinellidae
MACOL1329-11	AAP8604	Coleoptera	Coccinellidae
MACOL1330-11	AAP8604	Coleoptera	Coccinellidae
MACOL1331-11	AAP8604	Coleoptera	Coccinellidae
MACOL2996-13	AAP8604	Coleoptera	Coccinellidae
MACOL401-10	AAP8604	Coleoptera	Coccinellidae
MAMTD515-12	AAP8604	Coleoptera	Coccinellidae
MAMTD518-12	AAP8604	Coleoptera	Coccinellidae
MAMTD519-12	AAP8604	Coleoptera	Coccinellidae
MAMTF1043-12	AAP8604	Coleoptera	Coccinellidae
MAMTF1048-12	AAP8604	Coleoptera	Coccinellidae
MAMTF1050-12	AAP8604	Coleoptera	Coccinellidae
MAMTG061-12	AAP8604	Coleoptera	Coccinellidae
MACOL1369-11	AAZ4384	Coleoptera	Coccinellidae
GMPBC010-18	ABW8774	Coleoptera	Coccinellidae
MACOL1751-12	ABW8774	Coleoptera	Coccinellidae
GMPBH111-18	ABX0164	Coleoptera	Coccinellidae
MACOL1637-12	ABX0164	Coleoptera	Coccinellidae
MACOL1641-12	ABX0167	Coleoptera	Coccinellidae
MAMTF1036-12	ABX2092	Coleoptera	Coccinellidae
MAMTF1040-12	ABX2092	Coleoptera	Coccinellidae
MAMTF1058-12	ABX2092	Coleoptera	Coccinellidae
MAMTF1037-12	ABX2094	Coleoptera	Coccinellidae
MAMTF1044-12	ABX2097	Coleoptera	Coccinellidae
GMPBM755-18	ABX2099	Coleoptera	Coccinellidae
GMPBN377-18	ABX2099	Coleoptera	Coccinellidae
GMPBS158-18	ABX2099	Coleoptera	Coccinellidae
GMPQC729-19	ABX2099	Coleoptera	Coccinellidae
GMPQC747-19	ABX2099	Coleoptera	Coccinellidae
GMPQC763-19	ABX2099	Coleoptera	Coccinellidae
GMPQE1309-19	ABX2099	Coleoptera	Coccinellidae
GMPQE1311-19	ABX2099	Coleoptera	Coccinellidae
GMPQE1332-19	ABX2099	Coleoptera	Coccinellidae
GMPQE1336-19	ABX2099	Coleoptera	Coccinellidae
GMPQE1341-19	ABX2099	Coleoptera	Coccinellidae
GMPQE1349-19	ABX2099	Coleoptera	Coccinellidae
GMPQE1350-19	ABX2099	Coleoptera	Coccinellidae
GMPQI081-19	ABX2099	Coleoptera	Coccinellidae
GMPQI094-19	ABX2099	Coleoptera	Coccinellidae
GMPQI111-19	ABX2099	Coleoptera	Coccinellidae
GMPQI119-19	ABX2099	Coleoptera	Coccinellidae
GMPQI138-19	ABX2099	Coleoptera	Coccinellidae
GMPQU157-19	ABX2099	Coleoptera	Coccinellidae
MAMTF1061-12	ABX2099	Coleoptera	Coccinellidae
MAMTP1681-13	ABX2099	Coleoptera	Coccinellidae
MAMTP1886-13	ABX2099	Coleoptera	Coccinellidae
MAMTR105-14	ABX2099	Coleoptera	Coccinellidae
PMNHE478-15	ABX2099	Coleoptera	Coccinellidae
PMNHE490-15	ABX2099	Coleoptera	Coccinellidae
PMNHF327-15	ABX2099	Coleoptera	Coccinellidae
PMNHF329-15	ABX2099	Coleoptera	Coccinellidae
GMPBL239-18	ABX2101	Coleoptera	Coccinellidae
GMPQI096-19	ABX2101	Coleoptera	Coccinellidae
MAMTF1046-12	ABX2101	Coleoptera	Coccinellidae
MAMTF1063-12	ABX2101	Coleoptera	Coccinellidae
MAMTH722-12	ABX2101	Coleoptera	Coccinellidae
MAMTI1442-12	ABX2101	Coleoptera	Coccinellidae
MAMTI1464-12	ABX2101	Coleoptera	Coccinellidae
MAMTK552-12	ABX2101	Coleoptera	Coccinellidae
MAMTL484-12	ABX2101	Coleoptera	Coccinellidae
MAMTP1684-13	ABX2101	Coleoptera	Coccinellidae
MAMTQ254-14	ABX2101	Coleoptera	Coccinellidae
PMNHA323-14	ABX2101	Coleoptera	Coccinellidae
PMNHC143-15	ABX2101	Coleoptera	Coccinellidae
PMNHC144-15	ABX2101	Coleoptera	Coccinellidae
PMNHD946-15	ABX2101	Coleoptera	Coccinellidae
PMNHD958-15	ABX2101	Coleoptera	Coccinellidae
PMNHD977-15	ABX2101	Coleoptera	Coccinellidae
PMNHE484-15	ABX2101	Coleoptera	Coccinellidae
PMNHF330-15	ABX2101	Coleoptera	Coccinellidae
MAMTE819-12	ABX2106	Coleoptera	Coccinellidae
MAMTL450-12	ABX2106	Coleoptera	Coccinellidae
MAMTL481-12	ABX2106	Coleoptera	Coccinellidae
PMNHE492-15	ABX2106	Coleoptera	Coccinellidae
GMPBD148-18	ABX2109	Coleoptera	Coccinellidae
GMPBG228-18	ABX2109	Coleoptera	Coccinellidae
GMPBG291-18	ABX2109	Coleoptera	Coccinellidae
MAMTA1471-12	ABX2109	Coleoptera	Coccinellidae
MAMTH724-12	ABX2109	Coleoptera	Coccinellidae
MAMTI1446-12	ABX2109	Coleoptera	Coccinellidae
MAMTI1460-12	ABX2109	Coleoptera	Coccinellidae
MAMTI1470-12	ABX2109	Coleoptera	Coccinellidae
MAMTJ891-12	ABX2109	Coleoptera	Coccinellidae
MAMTK235-12	ABX2109	Coleoptera	Coccinellidae
MAMTK246-12	ABX2109	Coleoptera	Coccinellidae
MACOL2041-12	ABX7334	Coleoptera	Coccinellidae
MAMTH725-12	ABZ8957	Coleoptera	Coccinellidae
MAMTI1435-12	ABZ8957	Coleoptera	Coccinellidae
MAMTI1436-12	ABZ8957	Coleoptera	Coccinellidae
MAMTI1438-12	ABZ8957	Coleoptera	Coccinellidae
MAMTI1448-12	ABZ8957	Coleoptera	Coccinellidae
MAMTI1461-12	ABZ8957	Coleoptera	Coccinellidae
MAMTI1465-12	ABZ8957	Coleoptera	Coccinellidae
MAMTI1471-12	ABZ8957	Coleoptera	Coccinellidae
MAMTJ882-12	ABZ8957	Coleoptera	Coccinellidae
MAMTJ890-12	ABZ8957	Coleoptera	Coccinellidae
MAMTK234-12	ABZ8957	Coleoptera	Coccinellidae
MAMTK236-12	ABZ8957	Coleoptera	Coccinellidae
MAMTK237-12	ABZ8957	Coleoptera	Coccinellidae
MAMTK238-12	ABZ8957	Coleoptera	Coccinellidae
MAMTK239-12	ABZ8957	Coleoptera	Coccinellidae
MAMTK240-12	ABZ8957	Coleoptera	Coccinellidae
MAMTK241-12	ABZ8957	Coleoptera	Coccinellidae
MAMTK242-12	ABZ8957	Coleoptera	Coccinellidae
MAMTK243-12	ABZ8957	Coleoptera	Coccinellidae
MAMTK244-12	ABZ8957	Coleoptera	Coccinellidae
MAMTK245-12	ABZ8957	Coleoptera	Coccinellidae
MAMTK252-12	ABZ8957	Coleoptera	Coccinellidae
MAMTK253-12	ABZ8957	Coleoptera	Coccinellidae
MAMTK551-12	ABZ8957	Coleoptera	Coccinellidae
MAMTK557-12	ABZ8957	Coleoptera	Coccinellidae
MAMTK558-12	ABZ8957	Coleoptera	Coccinellidae
MAMTL438-12	ABZ8957	Coleoptera	Coccinellidae
MAMTL439-12	ABZ8957	Coleoptera	Coccinellidae
MAMTL440-12	ABZ8957	Coleoptera	Coccinellidae
MAMTL441-12	ABZ8957	Coleoptera	Coccinellidae
MAMTL442-12	ABZ8957	Coleoptera	Coccinellidae
MAMTL443-12	ABZ8957	Coleoptera	Coccinellidae
MAMTL444-12	ABZ8957	Coleoptera	Coccinellidae
MAMTL445-12	ABZ8957	Coleoptera	Coccinellidae
MAMTL446-12	ABZ8957	Coleoptera	Coccinellidae
MAMTL447-12	ABZ8957	Coleoptera	Coccinellidae
MAMTL448-12	ABZ8957	Coleoptera	Coccinellidae
MAMTL452-12	ABZ8957	Coleoptera	Coccinellidae
MAMTL457-12	ABZ8957	Coleoptera	Coccinellidae
MAMTL458-12	ABZ8957	Coleoptera	Coccinellidae
MAMTL460-12	ABZ8957	Coleoptera	Coccinellidae
MAMTL461-12	ABZ8957	Coleoptera	Coccinellidae
MAMTL462-12	ABZ8957	Coleoptera	Coccinellidae
MAMTL463-12	ABZ8957	Coleoptera	Coccinellidae
MAMTL464-12	ABZ8957	Coleoptera	Coccinellidae
MAMTL465-12	ABZ8957	Coleoptera	Coccinellidae
MAMTL466-12	ABZ8957	Coleoptera	Coccinellidae
MAMTL467-12	ABZ8957	Coleoptera	Coccinellidae
MAMTL468-12	ABZ8957	Coleoptera	Coccinellidae
MAMTL469-12	ABZ8957	Coleoptera	Coccinellidae
MAMTL470-12	ABZ8957	Coleoptera	Coccinellidae
MAMTL471-12	ABZ8957	Coleoptera	Coccinellidae
MAMTL472-12	ABZ8957	Coleoptera	Coccinellidae
MAMTL474-12	ABZ8957	Coleoptera	Coccinellidae
MAMTL476-12	ABZ8957	Coleoptera	Coccinellidae
MAMTL477-12	ABZ8957	Coleoptera	Coccinellidae
MAMTL479-12	ABZ8957	Coleoptera	Coccinellidae
MAMTL480-12	ABZ8957	Coleoptera	Coccinellidae
MAMTL483-12	ABZ8957	Coleoptera	Coccinellidae
MAMTM126-13	ABZ8957	Coleoptera	Coccinellidae
MAMTM128-13	ABZ8957	Coleoptera	Coccinellidae
MAMTM129-13	ABZ8957	Coleoptera	Coccinellidae
MAMTM130-13	ABZ8957	Coleoptera	Coccinellidae
MAMTM131-13	ABZ8957	Coleoptera	Coccinellidae
MAMTM132-13	ABZ8957	Coleoptera	Coccinellidae
MAMTM133-13	ABZ8957	Coleoptera	Coccinellidae
MAMTM135-13	ABZ8957	Coleoptera	Coccinellidae
MAMTM152-13	ABZ8957	Coleoptera	Coccinellidae
MAMTM153-13	ABZ8957	Coleoptera	Coccinellidae
MAMTM154-13	ABZ8957	Coleoptera	Coccinellidae
MAMTM155-13	ABZ8957	Coleoptera	Coccinellidae
MAMTM156-13	ABZ8957	Coleoptera	Coccinellidae
MAMTM157-13	ABZ8957	Coleoptera	Coccinellidae
MAMTM158-13	ABZ8957	Coleoptera	Coccinellidae
MAMTM159-13	ABZ8957	Coleoptera	Coccinellidae
MAMTM160-13	ABZ8957	Coleoptera	Coccinellidae
MAMTM161-13	ABZ8957	Coleoptera	Coccinellidae
MAMTM162-13	ABZ8957	Coleoptera	Coccinellidae
MAMTM163-13	ABZ8957	Coleoptera	Coccinellidae
MAMTM164-13	ABZ8957	Coleoptera	Coccinellidae
MAMTM165-13	ABZ8957	Coleoptera	Coccinellidae
MAMTM166-13	ABZ8957	Coleoptera	Coccinellidae
MAMTM495-14	ABZ8957	Coleoptera	Coccinellidae
MAMTN438-13	ABZ8957	Coleoptera	Coccinellidae
MAMTV111-14	ABZ8957	Coleoptera	Coccinellidae
MAMTV112-14	ABZ8957	Coleoptera	Coccinellidae
MAMTV116-14	ABZ8957	Coleoptera	Coccinellidae
MAMTV117-14	ABZ8957	Coleoptera	Coccinellidae
MAMTV118-14	ABZ8957	Coleoptera	Coccinellidae
MAMTV120-14	ABZ8957	Coleoptera	Coccinellidae
MAMTV121-14	ABZ8957	Coleoptera	Coccinellidae
MAMTV127-14	ABZ8957	Coleoptera	Coccinellidae
MAMTV129-14	ABZ8957	Coleoptera	Coccinellidae
MAMTV130-14	ABZ8957	Coleoptera	Coccinellidae
MAMTV131-14	ABZ8957	Coleoptera	Coccinellidae
MAMTV133-14	ABZ8957	Coleoptera	Coccinellidae
MAMTW234-14	ABZ8957	Coleoptera	Coccinellidae
MAMTW235-14	ABZ8957	Coleoptera	Coccinellidae
MAMTW236-14	ABZ8957	Coleoptera	Coccinellidae
MAMTW237-14	ABZ8957	Coleoptera	Coccinellidae
MAMTW238-14	ABZ8957	Coleoptera	Coccinellidae
MAMTW239-14	ABZ8957	Coleoptera	Coccinellidae
MAMTW240-14	ABZ8957	Coleoptera	Coccinellidae
MAMTW241-14	ABZ8957	Coleoptera	Coccinellidae
MAMTW242-14	ABZ8957	Coleoptera	Coccinellidae
MAMTW243-14	ABZ8957	Coleoptera	Coccinellidae
MAMTW244-14	ABZ8957	Coleoptera	Coccinellidae
MAMTW245-14	ABZ8957	Coleoptera	Coccinellidae
MAMTW246-14	ABZ8957	Coleoptera	Coccinellidae
MAMTW247-14	ABZ8957	Coleoptera	Coccinellidae
MAMTW248-14	ABZ8957	Coleoptera	Coccinellidae
MAMTW253-14	ABZ8957	Coleoptera	Coccinellidae
MAMTW254-14	ABZ8957	Coleoptera	Coccinellidae
MAMTW255-14	ABZ8957	Coleoptera	Coccinellidae
MAMTW257-14	ABZ8957	Coleoptera	Coccinellidae
MAMTW258-14	ABZ8957	Coleoptera	Coccinellidae
MAMTW259-14	ABZ8957	Coleoptera	Coccinellidae
MAMTW260-14	ABZ8957	Coleoptera	Coccinellidae
MAMTW261-14	ABZ8957	Coleoptera	Coccinellidae
MAMTW263-14	ABZ8957	Coleoptera	Coccinellidae
MAMTW264-14	ABZ8957	Coleoptera	Coccinellidae
MAMTW265-14	ABZ8957	Coleoptera	Coccinellidae
MAMTW266-14	ABZ8957	Coleoptera	Coccinellidae
MAMTW267-14	ABZ8957	Coleoptera	Coccinellidae
MAMTW268-14	ABZ8957	Coleoptera	Coccinellidae
MAMTW269-14	ABZ8957	Coleoptera	Coccinellidae
MAMTX191-14	ABZ8957	Coleoptera	Coccinellidae
MAMTY335-14	ABZ8957	Coleoptera	Coccinellidae
MAMTY337-14	ABZ8957	Coleoptera	Coccinellidae
MAMTY341-14	ABZ8957	Coleoptera	Coccinellidae
PMNHA311-14	ABZ8957	Coleoptera	Coccinellidae
PMNHA317-14	ABZ8957	Coleoptera	Coccinellidae
PMNHA324-14	ABZ8957	Coleoptera	Coccinellidae
PMNHA568-14	ABZ8957	Coleoptera	Coccinellidae
PMNHJ088-15	ABZ8957	Coleoptera	Coccinellidae
PMNHJ090-15	ABZ8957	Coleoptera	Coccinellidae
PMNHJ092-15	ABZ8957	Coleoptera	Coccinellidae
PMNHJ093-15	ABZ8957	Coleoptera	Coccinellidae
PMNHK029-15	ABZ8957	Coleoptera	Coccinellidae
PMNHK030-15	ABZ8957	Coleoptera	Coccinellidae
PMNHK031-15	ABZ8957	Coleoptera	Coccinellidae
PMNHK032-15	ABZ8957	Coleoptera	Coccinellidae
PMNHL077-15	ABZ8957	Coleoptera	Coccinellidae
PMNHN320-15	ABZ8957	Coleoptera	Coccinellidae
PMNHN324-15	ABZ8957	Coleoptera	Coccinellidae
MAMTL482-12	ABZ8960	Coleoptera	Coccinellidae
GMPBK1862-18	ABZ9839	Coleoptera	Coccinellidae
GMPBL298-18	ABZ9839	Coleoptera	Coccinellidae
GMPBM274-18	ABZ9839	Coleoptera	Coccinellidae
MAMTD522-12	ABZ9839	Coleoptera	Coccinellidae
MAMTG887-12	ABZ9839	Coleoptera	Coccinellidae
MAMTM140-13	ABZ9839	Coleoptera	Coccinellidae
GMPQE1326-19	ACG4490	Coleoptera	Coccinellidae
MAMTO329-13	ACG4490	Coleoptera	Coccinellidae
MAMTO330-13	ACG4490	Coleoptera	Coccinellidae
MAMTO331-13	ACG4490	Coleoptera	Coccinellidae
PMNHE491-15	ACG4490	Coleoptera	Coccinellidae
MACOL2998-13	ACI8622	Coleoptera	Coccinellidae
MACOL2999-13	ACI8622	Coleoptera	Coccinellidae
MACOL3000-13	ACI8622	Coleoptera	Coccinellidae
PMNHJ085-15	ACK7712	Coleoptera	Coccinellidae
MAMTP1847-13	ACK9065	Coleoptera	Coccinellidae
MAMTN693-13	ACK9320	Coleoptera	Coccinellidae
GMPQG608-19	ACP2513	Coleoptera	Coccinellidae
MAMTW249-14	ACP4018	Coleoptera	Coccinellidae
PMNHN423-15	ACP4018	Coleoptera	Coccinellidae
MAMTS217-14	ACP4109	Coleoptera	Coccinellidae
MAMTT146-14	ACP4109	Coleoptera	Coccinellidae
PMNHH093-15	ACP4109	Coleoptera	Coccinellidae
PMNHI129-15	ACP4109	Coleoptera	Coccinellidae
PMNHK028-15	ACV2588	Coleoptera	Coccinellidae
GMPBN215-18	ACW8567	Coleoptera	Coccinellidae
GMPBN258-18	ACW8567	Coleoptera	Coccinellidae
GMPBN289-18	ACW8567	Coleoptera	Coccinellidae
MAMTO333-13	ACW8567	Coleoptera	Coccinellidae
PMNHD979-15	ACW8567	Coleoptera	Coccinellidae
GMPQC1119-19	ADZ8498	Coleoptera	Coccinellidae
GMPQC753-19	ADZ8498	Coleoptera	Coccinellidae
GMPQC758-19	ADZ8498	Coleoptera	Coccinellidae
GMPQE1316-19	ADZ8498	Coleoptera	Coccinellidae
GMPQG609-19	ADZ8498	Coleoptera	Coccinellidae
GMPQI127-19	ADZ8498	Coleoptera	Coccinellidae
GMPQE1337-19	ADZ9502	Coleoptera	Coccinellidae
GMPQC732-19	AEA0092	Coleoptera	Coccinellidae
GMPQC761-19	AEA0092	Coleoptera	Coccinellidae
GMPQE1312-19	AEA0092	Coleoptera	Coccinellidae
GMPQE1315-19	AEA0092	Coleoptera	Coccinellidae
GMPQE1322-19	AEA0092	Coleoptera	Coccinellidae
GMPQE1329-19	AEA0092	Coleoptera	Coccinellidae
GMPQE1344-19	AEA0092	Coleoptera	Coccinellidae
GMPQE1347-19	AEA0092	Coleoptera	Coccinellidae
GMPQG611-19	AEA0092	Coleoptera	Coccinellidae
GMPQG612-19	AEA0092	Coleoptera	Coccinellidae
GMPQE1308-19	AEA2072	Coleoptera	Coccinellidae
MACOL845-10		Coleoptera	Coccinellidae
MAMTN459-13	ABA2914	Coleoptera	Corylophidae	Corylophinae	Sericoderus	Sericoderus lateralis
MAMTO328-13	ACG3452	Coleoptera	Corylophidae
MAMTN464-13	ACG6152	Coleoptera	Corylophidae
GMPBV032-18	ACG6361	Coleoptera	Corylophidae
MAMTN463-13	ACG6361	Coleoptera	Corylophidae
PMNHE494-15	ACG6361	Coleoptera	Corylophidae
MAMTS222-14	ACP4108	Coleoptera	Corylophidae
MAMTO337-13		Coleoptera	Corylophidae
MACOL1650-12	ABX0149	Coleoptera	Cryptophagidae
MACOL1653-12	ABX0149	Coleoptera	Cryptophagidae
MACOL1651-12	ABX0150	Coleoptera	Cryptophagidae
MACOL1654-12	ABX0151	Coleoptera	Cryptophagidae
MAMTF1073-12	ABX2102	Coleoptera	Cryptophagidae
MAMTI1443-12	ABZ8549	Coleoptera	Cryptophagidae
MAMTI1469-12	ABZ8549	Coleoptera	Cryptophagidae
MAMTX192-14	ACP4042	Coleoptera	Cryptophagidae
PMNHN322-15	ACV3144	Coleoptera	Cryptophagidae
PMNHN325-15	ACV3144	Coleoptera	Cryptophagidae
GMPBG213-18	ADV7116	Coleoptera	Cryptophagidae
MAMTP1664-13	ACF6162	Coleoptera	Curculionidae	Ceutorhynchinae	Rhinoncus	Rhinoncus sibiricus
GMPQE1331-19	AAO0192	Coleoptera	Curculionidae	Curculioninae	Smicronyx	Smicronyx jungermanniae
GMPQE1321-19	AEA2263	Coleoptera	Curculionidae	Curculioninae	Smicronyx
GMPQE1328-19	AEA2263	Coleoptera	Curculionidae	Curculioninae	Smicronyx
GMPQE1343-19	AEA2263	Coleoptera	Curculionidae	Curculioninae	Smicronyx
GBMIN32214-13	ACZ1649	Coleoptera	Curculionidae	Dryophthorinae	Rhynchophorus	Rhynchophorus ferrugineus
GBMIN32215-13	ACZ1649	Coleoptera	Curculionidae	Dryophthorinae	Rhynchophorus	Rhynchophorus ferrugineus
GBMIN32216-13	ACZ1649	Coleoptera	Curculionidae	Dryophthorinae	Rhynchophorus	Rhynchophorus ferrugineus
GBMIN32217-13	ACZ1649	Coleoptera	Curculionidae	Dryophthorinae	Rhynchophorus	Rhynchophorus ferrugineus
GBMIN32218-13	ACZ1649	Coleoptera	Curculionidae	Dryophthorinae	Rhynchophorus	Rhynchophorus ferrugineus
GBMIN32219-13	ACZ1649	Coleoptera	Curculionidae	Dryophthorinae	Rhynchophorus	Rhynchophorus ferrugineus
GBMIN32220-13	ACZ1649	Coleoptera	Curculionidae	Dryophthorinae	Rhynchophorus	Rhynchophorus ferrugineus
GBMIN32384-13	ACZ1649	Coleoptera	Curculionidae	Dryophthorinae	Rhynchophorus	Rhynchophorus ferrugineus
GBMIN32385-13	ACZ1649	Coleoptera	Curculionidae	Dryophthorinae	Rhynchophorus	Rhynchophorus ferrugineus
GBMIN32386-13	ACZ1649	Coleoptera	Curculionidae	Dryophthorinae	Rhynchophorus	Rhynchophorus ferrugineus
GBMIN32387-13	ACZ1649	Coleoptera	Curculionidae	Dryophthorinae	Rhynchophorus	Rhynchophorus ferrugineus
GBMIN32388-13	ACZ1649	Coleoptera	Curculionidae	Dryophthorinae	Rhynchophorus	Rhynchophorus ferrugineus
GBMIN32389-13	ACZ1649	Coleoptera	Curculionidae	Dryophthorinae	Rhynchophorus	Rhynchophorus ferrugineus
GBMIN32390-13	ACZ1649	Coleoptera	Curculionidae	Dryophthorinae	Rhynchophorus	Rhynchophorus ferrugineus
PWINA064-16	ACZ1649	Coleoptera	Curculionidae	Dryophthorinae	Rhynchophorus	Rhynchophorus ferrugineus
PWINA065-16	ACZ1649	Coleoptera	Curculionidae	Dryophthorinae	Rhynchophorus	Rhynchophorus ferrugineus
PWINA066-16	ACZ1649	Coleoptera	Curculionidae	Dryophthorinae	Rhynchophorus	Rhynchophorus ferrugineus
PWINA067-16	ACZ1649	Coleoptera	Curculionidae	Dryophthorinae	Rhynchophorus	Rhynchophorus ferrugineus
PWINA068-16	ACZ1649	Coleoptera	Curculionidae	Dryophthorinae	Rhynchophorus	Rhynchophorus ferrugineus
PWINA069-16	ACZ1649	Coleoptera	Curculionidae	Dryophthorinae	Rhynchophorus	Rhynchophorus ferrugineus
PWINA070-16	ACZ1649	Coleoptera	Curculionidae	Dryophthorinae	Rhynchophorus	Rhynchophorus ferrugineus
PWINA071-16	ACZ1649	Coleoptera	Curculionidae	Dryophthorinae	Rhynchophorus	Rhynchophorus ferrugineus
PWINA072-16	ACZ1649	Coleoptera	Curculionidae	Dryophthorinae	Rhynchophorus	Rhynchophorus ferrugineus
PWINA073-16	ACZ1649	Coleoptera	Curculionidae	Dryophthorinae	Rhynchophorus	Rhynchophorus ferrugineus
PWINA074-16	ACZ1649	Coleoptera	Curculionidae	Dryophthorinae	Rhynchophorus	Rhynchophorus ferrugineus
PWINA075-16	ACZ1649	Coleoptera	Curculionidae	Dryophthorinae	Rhynchophorus	Rhynchophorus ferrugineus
PWINA076-16	ACZ1649	Coleoptera	Curculionidae	Dryophthorinae	Rhynchophorus	Rhynchophorus ferrugineus
PWINA077-16	ACZ1649	Coleoptera	Curculionidae	Dryophthorinae	Rhynchophorus	Rhynchophorus ferrugineus
PWINA078-16	ACZ1649	Coleoptera	Curculionidae	Dryophthorinae	Rhynchophorus	Rhynchophorus ferrugineus
PWINA079-16	ACZ1649	Coleoptera	Curculionidae	Dryophthorinae	Rhynchophorus	Rhynchophorus ferrugineus
PWINA080-16	ACZ1649	Coleoptera	Curculionidae	Dryophthorinae	Rhynchophorus	Rhynchophorus ferrugineus
PWINA081-16	ACZ1649	Coleoptera	Curculionidae	Dryophthorinae	Rhynchophorus	Rhynchophorus ferrugineus
PWINA082-16	ACZ1649	Coleoptera	Curculionidae	Dryophthorinae	Rhynchophorus	Rhynchophorus ferrugineus
PWINA083-16	ACZ1649	Coleoptera	Curculionidae	Dryophthorinae	Rhynchophorus	Rhynchophorus ferrugineus
PWINA084-16	ACZ1649	Coleoptera	Curculionidae	Dryophthorinae	Rhynchophorus	Rhynchophorus ferrugineus
PWINA085-16	ACZ1649	Coleoptera	Curculionidae	Dryophthorinae	Rhynchophorus	Rhynchophorus ferrugineus
PWINA119-16	ACZ1649	Coleoptera	Curculionidae	Dryophthorinae	Rhynchophorus	Rhynchophorus ferrugineus
PWINA120-16	ACZ1649	Coleoptera	Curculionidae	Dryophthorinae	Rhynchophorus	Rhynchophorus ferrugineus
PWINA121-16	ACZ1649	Coleoptera	Curculionidae	Dryophthorinae	Rhynchophorus	Rhynchophorus ferrugineus
GBCL46931-19		Coleoptera	Curculionidae	Dryophthorinae	Rhynchophorus	Rhynchophorus ferrugineus
GBCL46932-19		Coleoptera	Curculionidae	Dryophthorinae	Rhynchophorus	Rhynchophorus ferrugineus
GBCL46933-19		Coleoptera	Curculionidae	Dryophthorinae	Rhynchophorus	Rhynchophorus ferrugineus
GBCL46934-19		Coleoptera	Curculionidae	Dryophthorinae	Rhynchophorus	Rhynchophorus ferrugineus
GBCL46935-19		Coleoptera	Curculionidae	Dryophthorinae	Rhynchophorus	Rhynchophorus ferrugineus
GBCL49367-19		Coleoptera	Curculionidae	Dryophthorinae	Rhynchophorus	Rhynchophorus ferrugineus
GBCL49368-19		Coleoptera	Curculionidae	Dryophthorinae	Rhynchophorus	Rhynchophorus ferrugineus
GBCL49369-19		Coleoptera	Curculionidae	Dryophthorinae	Rhynchophorus	Rhynchophorus ferrugineus
GBCL49370-19		Coleoptera	Curculionidae	Dryophthorinae	Rhynchophorus	Rhynchophorus ferrugineus
GBCL49371-19		Coleoptera	Curculionidae	Dryophthorinae	Rhynchophorus	Rhynchophorus ferrugineus
GBCL49372-19		Coleoptera	Curculionidae	Dryophthorinae	Rhynchophorus	Rhynchophorus ferrugineus
GBCL49373-19		Coleoptera	Curculionidae	Dryophthorinae	Rhynchophorus	Rhynchophorus ferrugineus
GBCL49374-19		Coleoptera	Curculionidae	Dryophthorinae	Rhynchophorus	Rhynchophorus ferrugineus
GBCL49375-19		Coleoptera	Curculionidae	Dryophthorinae	Rhynchophorus	Rhynchophorus ferrugineus
GBCL49376-19		Coleoptera	Curculionidae	Dryophthorinae	Rhynchophorus	Rhynchophorus ferrugineus
GBCL49377-19		Coleoptera	Curculionidae	Dryophthorinae	Rhynchophorus	Rhynchophorus ferrugineus
GBCL49378-19		Coleoptera	Curculionidae	Dryophthorinae	Rhynchophorus	Rhynchophorus ferrugineus
GBCL49379-19		Coleoptera	Curculionidae	Dryophthorinae	Rhynchophorus	Rhynchophorus ferrugineus
GBCL49380-19		Coleoptera	Curculionidae	Dryophthorinae	Rhynchophorus	Rhynchophorus ferrugineus
GBCL49381-19		Coleoptera	Curculionidae	Dryophthorinae	Rhynchophorus	Rhynchophorus ferrugineus
GBCL49382-19		Coleoptera	Curculionidae	Dryophthorinae	Rhynchophorus	Rhynchophorus ferrugineus
GBCL49383-19		Coleoptera	Curculionidae	Dryophthorinae	Rhynchophorus	Rhynchophorus ferrugineus
GBCL49384-19		Coleoptera	Curculionidae	Dryophthorinae	Rhynchophorus	Rhynchophorus ferrugineus
GBCL49385-19		Coleoptera	Curculionidae	Dryophthorinae	Rhynchophorus	Rhynchophorus ferrugineus
GBCL49386-19		Coleoptera	Curculionidae	Dryophthorinae	Rhynchophorus	Rhynchophorus ferrugineus
GBCL49387-19		Coleoptera	Curculionidae	Dryophthorinae	Rhynchophorus	Rhynchophorus ferrugineus
GBCL49388-19		Coleoptera	Curculionidae	Dryophthorinae	Rhynchophorus	Rhynchophorus ferrugineus
GBCL49389-19		Coleoptera	Curculionidae	Dryophthorinae	Rhynchophorus	Rhynchophorus ferrugineus
GBCL49390-19		Coleoptera	Curculionidae	Dryophthorinae	Rhynchophorus	Rhynchophorus ferrugineus
GBCL49391-19		Coleoptera	Curculionidae	Dryophthorinae	Rhynchophorus	Rhynchophorus ferrugineus
GBCL49392-19		Coleoptera	Curculionidae	Dryophthorinae	Rhynchophorus	Rhynchophorus ferrugineus
GBCL49393-19		Coleoptera	Curculionidae	Dryophthorinae	Rhynchophorus	Rhynchophorus ferrugineus
GBCL49394-19		Coleoptera	Curculionidae	Dryophthorinae	Rhynchophorus	Rhynchophorus ferrugineus
GBCL49395-19		Coleoptera	Curculionidae	Dryophthorinae	Rhynchophorus	Rhynchophorus ferrugineus
GBCL49396-19		Coleoptera	Curculionidae	Dryophthorinae	Rhynchophorus	Rhynchophorus ferrugineus
GBCL49397-19		Coleoptera	Curculionidae	Dryophthorinae	Rhynchophorus	Rhynchophorus ferrugineus
GBCL49398-19		Coleoptera	Curculionidae	Dryophthorinae	Rhynchophorus	Rhynchophorus ferrugineus
GBCL49399-19		Coleoptera	Curculionidae	Dryophthorinae	Rhynchophorus	Rhynchophorus ferrugineus
GBCL49400-19		Coleoptera	Curculionidae	Dryophthorinae	Rhynchophorus	Rhynchophorus ferrugineus
GBCL49401-19		Coleoptera	Curculionidae	Dryophthorinae	Rhynchophorus	Rhynchophorus ferrugineus
GBCL49402-19		Coleoptera	Curculionidae	Dryophthorinae	Rhynchophorus	Rhynchophorus ferrugineus
GBCL49403-19		Coleoptera	Curculionidae	Dryophthorinae	Rhynchophorus	Rhynchophorus ferrugineus
GBCL49404-19		Coleoptera	Curculionidae	Dryophthorinae	Rhynchophorus	Rhynchophorus ferrugineus
GBCL49405-19		Coleoptera	Curculionidae	Dryophthorinae	Rhynchophorus	Rhynchophorus ferrugineus
GBCL49406-19		Coleoptera	Curculionidae	Dryophthorinae	Rhynchophorus	Rhynchophorus ferrugineus
GBCL49407-19		Coleoptera	Curculionidae	Dryophthorinae	Rhynchophorus	Rhynchophorus ferrugineus
GBCL49408-19		Coleoptera	Curculionidae	Dryophthorinae	Rhynchophorus	Rhynchophorus ferrugineus
GBCL49409-19		Coleoptera	Curculionidae	Dryophthorinae	Rhynchophorus	Rhynchophorus ferrugineus
GBCL49410-19		Coleoptera	Curculionidae	Dryophthorinae	Rhynchophorus	Rhynchophorus ferrugineus
GBCL49411-19		Coleoptera	Curculionidae	Dryophthorinae	Rhynchophorus	Rhynchophorus ferrugineus
GBCL49412-19		Coleoptera	Curculionidae	Dryophthorinae	Rhynchophorus	Rhynchophorus ferrugineus
GBCL49413-19		Coleoptera	Curculionidae	Dryophthorinae	Rhynchophorus	Rhynchophorus ferrugineus
GBCL49414-19		Coleoptera	Curculionidae	Dryophthorinae	Rhynchophorus	Rhynchophorus ferrugineus
GBCL49415-19		Coleoptera	Curculionidae	Dryophthorinae	Rhynchophorus	Rhynchophorus ferrugineus
MASGI455-15	AAJ6887	Coleoptera	Curculionidae	Dryophthorinae	Sitophilus	Sitophilus zeamais
MASGI456-15	AAJ6887	Coleoptera	Curculionidae	Dryophthorinae	Sitophilus	Sitophilus zeamais
MACOL2018-12	AAQ0019	Coleoptera	Curculionidae	Entiminae	Myllocerus	Myllocerus undecimpustulatus
MACOL2019-12	AAQ0019	Coleoptera	Curculionidae	Entiminae	Myllocerus	Myllocerus undecimpustulatus
MACOL715-10	AAQ0019	Coleoptera	Curculionidae	Entiminae	Myllocerus	Myllocerus undecimpustulatus
MACOL720-10	AAQ0019	Coleoptera	Curculionidae	Entiminae	Myllocerus	Myllocerus undecimpustulatus
MACOL722-10	AAQ0019	Coleoptera	Curculionidae	Entiminae	Myllocerus	Myllocerus undecimpustulatus
MACOL723-10	AAQ0019	Coleoptera	Curculionidae	Entiminae	Myllocerus	Myllocerus undecimpustulatus
MACOL739-10	AAQ0019	Coleoptera	Curculionidae	Entiminae	Myllocerus	Myllocerus undecimpustulatus
MAIMB088-09	AAQ0019	Coleoptera	Curculionidae	Entiminae	Myllocerus	Myllocerus undecimpustulatus
MAIMB089-09	AAQ0019	Coleoptera	Curculionidae	Entiminae	Myllocerus	Myllocerus undecimpustulatus
MAIMB090-09	AAQ0019	Coleoptera	Curculionidae	Entiminae	Myllocerus	Myllocerus undecimpustulatus
MAIMB091-09	AAQ0019	Coleoptera	Curculionidae	Entiminae	Myllocerus	Myllocerus undecimpustulatus
[truncated: 48,594 more rows]
